1 **Bi-reporter vaccinia virus for tracking viral infections *in vitro* and *in vivo***

2

3 Kevin Chiem<sup>1,2</sup>, Maria Lorenzo<sup>3</sup>, Javier Rangel-Moreno<sup>4</sup>, Maria De La Luz Garcia-  
4 Hernandez<sup>4</sup>, Jun-Gyu Park<sup>1,2</sup>, Aitor Nogales<sup>1,5</sup>, Rafael Blasco<sup>3\*</sup>, Luis Martínez-  
5 Sobrido<sup>1,2\*</sup>

6

7 <sup>1</sup>Department of Microbiology and Immunology, University of Rochester, 601 Elmwood  
8 Avenue, Rochester, New York, 14642, USA.

9 <sup>2</sup>Texas Biomedical Research Institute, 8715 W. Military Dr., San Antonio, Texas, 78212,  
10 USA.

11 <sup>3</sup>Departamento de Biotecnología, Centro Nacional Instituto de Investigación y  
12 Tecnología Agraria y Alimentaria (INIA CSIC), Ctra. La Coruña km 7.5, E-28040,  
13 Madrid, Spain.

14 <sup>4</sup>Division of Allergy/Immunology and Rheumatology, Department of Medicine, University  
15 of Rochester, Rochester, 601 Elmwood Avenue, Rochester, New York, 14642, USA.

16 <sup>5</sup>Animal Health Research Centre (CISA), Centro Nacional Instituto de Investigación y  
17 Tecnología Agraria y Alimentaria (INIA, CSIC), Valdeolmos, 28130, Madrid, Spain.

18

19 \* To whom correspondence should be addressed:

20 Luis Martínez-Sobrido

21 Texas Biomedical Research Institute

22 8715 W. Military Dr.

23 San Antonio, TX, 78212

24 E-mail: [lmartinez@txbiomed.org](mailto:lmartinez@txbiomed.org)

25 Rafael Blasco Lozano

26 Departamento de Biotecnología (INIA, CSIC)

27 Ctra. La Coruña km 7.5

28 E-28040 Madrid

29 SPAIN

30 Tlf +34 91 347 39 13

31 e-mail: [blasco@inia.es](mailto:blasco@inia.es)

32

33 **Running title:** Bi-reporter vaccinia virus.

34

35 **Keywords:** vaccinia virus, reporter genes, fluorescence, Scarlet, GFP,  
36 bioluminescence, NanoLuc, luciferase, *in vitro*, *in vivo*, *in vivo* imaging.

37

38

39

40

41

42

43

44

45

46

47

48 **ABSTRACT**

49 Recombinant viruses expressing reporter genes allow visualization and  
50 quantification of viral infections and can be used as valid surrogates to identify the  
51 presence of the virus in infected cells and animal models. However, one of the  
52 limitations of recombinant viruses expressing reporter genes is the use of either  
53 fluorescent or luciferase proteins that are used alternatively for different purposes.  
54 Vaccinia virus (VV) is widely used as a viral vector, including recombinant (r)VV singly  
55 expressing either fluorescent or luciferase reporter genes that are useful for specific  
56 purposes. In this report, we engineered two novel rVV stably expressing both  
57 fluorescent (Scarlet or GFP) and luciferase (Nluc) reporter genes from different loci in  
58 the viral genome. *In vitro*, these bi-reporter expressing rVV have similar growth kinetics  
59 and plaque phenotype than those of the parental WR VV isolate. *In vivo*, rVV  
60 Nluc/Scarlet and rVV Nluc/GFP effectively infected mice and were easily detected using  
61 *in vivo* imaging systems (IVIS) and *ex vivo* in the lungs from infected mice. We used  
62 these bi-reporter expressing rVV to assess viral pathogenesis, infiltration of immune  
63 cells in the lungs, and to directly identify the different subsets of cells infected by VV in  
64 the absence of antibody staining. Collectively, these rVV expressing two reporter genes  
65 open the feasibility to study the biology of viral infections *in vitro* and *in vivo*, including  
66 host-pathogen interactions and dynamics or tropism of viral infections. Moreover, they  
67 represent an excellent approach for the discovery of new prophylactics and/or  
68 therapeutics for the treatment of poxvirus infections.

69

70  
71  
72  
73  
74  
75  
76  
77  
78  
79  
80  
81  
82  
83  
84  
85  
86  
87  
88  
89  
90  
91  
92

## **IMPORTANCE**

Despite the eradication of variola virus (VARV), the causative agent of smallpox, poxviruses still represent an important threat to human health due to their possible use as bioterrorism agents and the emergence of zoonotic poxvirus diseases. Recombinant vaccinia viruses (rVV) expressing easily traceable fluorescent or luciferase reporter genes have significantly contributed to the progress of poxvirus research. However, rVV expressing one marker gene have several constraints for *in vitro* and *in vivo* studies, since both fluorescent and luciferase proteins impose certain limitations for specific applications. To overcome these limitations, we generated optimized rVV stably expressing both fluorescent (Scarlet or GFP) and luciferase (Nluc) reporter genes to easily track viral infection *in vitro* and *in vivo*. This new generation of double reporter-expressing rVV represent an excellent option to study viral infection dynamics in cultured cells and validated animal models of infection, and for the discovery of new poxvirus antiviral treatments.

93

94

## 95 **INTRODUCTION**

96 Poxviruses are large double stranded (ds)DNA viruses with a genome of ~135-380  
97 kb encoding up to 328 predicted open reading frames (ORFs) (1). The family *Poxviridae*  
98 includes several viruses of medical and veterinary importance. Some of the better-  
99 studied poxviruses belong to the Orthopoxvirus genus, which includes both vaccinia  
100 virus (VV), the prototypic member in the poxvirus family, and variola virus (VARV), the  
101 causative agent of smallpox. While smallpox has been eradicated, VARV still remains a  
102 pathogen of concern because of its potential use as a bioterrorism agent (2-4).  
103 Presently, much of the United States (US) population has not been vaccinated against  
104 smallpox (routine vaccination was discontinued in the 1970s) and, therefore, is  
105 susceptible to VARV infection (3, 5, 6). There is also a concern that monkeypox or  
106 additional Orthopoxviruses, can emerge and cause zoonotic disease due to a lack of  
107 pre-existing immunity within the human population (5).

108 VV constitutes a model virus for basic and biotechnological studies, and modification  
109 of its viral genome to express reporter genes has been vital in the study of viral gene  
110 expression, viral replication and pathogenesis, virus-host interactions, and cell entry  
111 mechanisms (7, 8). The development of reporter-expressing recombinant (r)VV has also  
112 been amendable to real-time and high-throughput screening (HTS) studies (9), and  
113 allow to easily assess viral infection without the use of laborious secondary methods to  
114 identify infected cells in culture or in live animals. However, to date, reporter-expressing  
115 rVV are limited to express a single reporter gene (e.g. fluorescence or luciferase

116 proteins) or express distinctive fluorescent proteins using different promoters to monitor  
117 gene expression patterns (10, 11). This is typically because the development of reporter  
118 viruses has been largely motivated by a specific type of study, such as *in vitro*  
119 quantification of viral entry and replication, or by antiviral or neutralizing antibody (NAb)  
120 screening assays (9, 12, 13). Although these rVV expressing either fluorescent or  
121 luciferase proteins have proven extremely useful, they also have limitations based on  
122 the intrinsic properties of the reporter genes. Fluorescent proteins represent an  
123 excellent option for *in vitro* studies to track viral infection compared to luciferase proteins  
124 (14-17). However, luciferase proteins are more sensitive and convenient in quantitative  
125 analyses than fluorescent proteins (18-21). In live animals, luciferase activity can be  
126 easily tracked longitudinally using *in vivo* imaging systems (IVIS) and can be used as a  
127 valid surrogate of viral infection without the need of sacrificing animals (22). Contrary,  
128 fluorescent proteins represent a better option to identify the types of cells infected by the  
129 virus as they can be easily detected using fluorescent microscopy and flow cytometry  
130 assays (15, 23-25).

131 Here, we describe the generation of novel and stable rVV expressing both luciferase  
132 (Nluc) and fluorescence (Scarlet or GFP) reporter genes optimally designed for the easy  
133 detection of viral infection by both luminescence and fluorescence expression,  
134 respectively; and thereby, circumventing the limitations of using rVV expressing a single  
135 luminescence or fluorescent reporter gene. We selected Nluc based on its intense  
136 brightness, small size and ATP-independence (18, 23). We chose Scarlet or GFP, in  
137 combination with Nluc, to easily track viral infections based on the red or green  
138 fluorescent signal, respectively. The use of Scarlet (red) or GFP (green) fluorescent

139 proteins would allow to track viral infections in genetically engineered cultured cells or  
140 animal models of infection. We selected GFP for its optimal brightness, and Scarlet for  
141 its excitation/emission at longer wavelengths, low toxicity and deeper light penetration in  
142 animal tissues (26). Notably, by introducing both fluorescent and bioluminescence  
143 reporter genes in the same virus, these rVV exploit the advantages of both fluorescent  
144 and bioluminescence proteins without the limitations of using one or the other.

145 *In vitro*, the plaque phenotype and growth kinetics of Nluc/Scarlet and Nluc/GFP bi-  
146 reporter rVV were comparable to the unmodified WR VV strain. Notably, reporter gene  
147 expression from the bi-reporter expressing rVV correlated with the levels of viral  
148 replication. *In vivo*, rVV Nluc/Scarlet and rVV Nluc/GFP were readily detected in real-  
149 time in infected animals by bioluminescence (Nluc), and *ex vivo* upon excision of lungs  
150 from infected animals (Scarlet or GFP) using an *in vivo* imaging system (IVIS).  
151 Furthermore, the spatial distribution of reporter viruses and their cellular targets in the  
152 lungs of infected mice were detectable in formalin-fixed, paraffin-embedded, tissue  
153 sections. Lastly, we determined the proportion of GFP-positive cells and visualized the  
154 spatial distribution of neutrophils in excised lungs from animals infected with rVV  
155 Nluc/GFP using flow cytometry and microscopy. Altogether, our studies indicate that  
156 these bi-reporter expressing rVV represent an excellent tool for studying the biology and  
157 immunology of VV *in vitro* and *in vivo*. The expression of two foreign genes inserted in  
158 different loci in the viral genome also opens the feasibility of generating new VV-based  
159 vaccine vectors expressing two foreign antigens for improving the treatment of other  
160 human pathogens. Notably, the generation of recombinant viruses expressing both  
161 fluorescent and bioluminescent proteins could be applied to other DNA viruses, allowing

162 their study *in vitro* and *in vivo*, including the function of viral proteins, virus-host  
163 interactions, and the discovery of new antiviral therapeutic strategies.

164

## 165 **MATERIALS AND METHODS**

### 166 **Cells**

167 African green monkey kidney epithelial BSC-1 cells (ATCC CCL-26) were  
168 maintained in Eagle's minimal essential medium (EMEM; Lonza, Inc.) containing 5%  
169 fetal bovine serum (FBS) and 1% PSG (100 U/ml penicillin, 100 µg/ml streptomycin and  
170 2 mM L-glutamine) at 37°C with 5% CO<sub>2</sub> supplementation.

### 171 **Viruses**

172 Vaccinia virus (VV) Western Reserve (WR) strain was obtained from the American  
173 Type Culture Collection (ATCC VR-119) and routinely propagated in BSC-1 cells.  
174 Previously described vΔA27-ΔF13 is a VV mutant in which most of the coding sequence  
175 of genes A27L and F13L has been deleted (27).

### 176 **Plasmids**

177 Plasmid pRB-NLuc, designed to express the NLuc gene downstream of the F13L  
178 gene has been previously described (27). Plasmid pA.S-TagGFP2 for insertion of GFP  
179 downstream of the A27L gene was constructed previously (27). A similar construct  
180 containing the gene coding for the red fluorescent Scarlet protein, derived from mCherry  
181 (28), was subcloned from plasmid pRB-Scarlet (27, 29) into the plasmid pA-LE-RGR  
182 (Sanchez-Puig and Blasco, unpublished), which contains A27L recombination sites  
183 flanking the A27L gene, to generate pA.S-Scarlet. For optimal expression, mScarlet was  
184 placed under a strong poxviral early-late synthetic promoter (30).



185        **Generation of recombinant vaccinia viruses (rVV)**

186        rVV were generated as previously described (27). Briefly, BSC-1 cells (6-well plate  
187        format,  $10^6$  cells/well), were infected at a multiplicity of infection (MOI) of 0.05 plaque  
188        forming units (PFU)/cell with v $\Delta$ A27- $\Delta$ F13. After 1 h viral adsorption, virus inoculum was  
189        removed and cells were then transfected with 2  $\mu$ g of plasmid DNA using FuGeneHD  
190        (Promega) according to the manufacturer's recommendations. The rVV Nluc/GFP was  
191        generated by transfecting pRB-NLuc and pA.S-TagGFP2 plasmids. The rVV  
192        Nluc/Scarlet was obtained by transfecting pRB-NLuc and pA.S-Scarlet plasmids. After  
193        2–3 days, cells were harvested, and rVV Nluc/GFP and rVV Nluc/Scarlet were isolated  
194        by three consecutive rounds of plaque purification. Viral stocks were generated in BSC-  
195        1 cells and viral titers were determined by standard plaque assay (PFU/ml).

196        **SDS-PAGE electrophoresis and Western blot analysis**

197        Confluent monolayers of BSC-1 cells (6-well plate format,  $10^6$  cells/well) were  
198        infected (MOI 0.05) with the indicated rVV. After 24 h infection, cell extracts were  
199        prepared in denaturant buffer (80 mM Tris-HCl, pH 6.8, 2% sodium dodecyl sulfate  
200        [SDS], 10% glycerol, 0.01% bromophenol blue solution and 0.71 M 2-mercaptoethanol).  
201        After SDS-polyacrylamide gel electrophoresis (PAGE), proteins were transferred to  
202        PVDF membranes and incubated 1 h at room temperature with primary antibodies  
203        diluted in PBS containing 0.05% Tween-20 and 1% nonfat dry milk. Primary antibodies  
204        include anti-NLuc rabbit polyclonal (1:6,000) (Promega), anti-mCherry rabbit polyclonal  
205        (1:5,000) (kindly provided by Dr. Antonio Alcamí), anti-GFP rabbit polyclonal (1:1,000)  
206        (Chemicon) rat monoclonal antibody 15B6, specific for F13 (1:50) (kindly provided by  
207        Dr. Gerhard Hiller), and anti-Actin monoclonal (1:500) (Sigma). After extensive washing

208 with PBS containing 0.05% Tween-20, membranes were incubated with HRP-  
209 conjugated secondary antibodies diluted 1:3,000 in PBS containing 0.05% Tween-20  
210 and 1% nonfat dry milk. Secondary antibodies were polyclonal goat anti-rabbit IgG  
211 (Dako), polyclonal goat anti-rat IgG (Dako) and polyclonal goat anti-mouse IgG (Sigma).  
212 After removal of unbound antibodies, membranes were incubated for 1 min with a 1:1  
213 mix of solution A (2.5 mM luminol [Sigma], 0.4 mM p-coumaric acid [Sigma], 100 mM  
214 Tris-HCl, pH 8.5) and solution B (0.018% H<sub>2</sub>O<sub>2</sub>, 100 mM Tris-HCl, pH 8.5) to finally  
215 record the luminescence using a Molecular Imager Chemi Doc-XRS (Bio-Rad). The  
216 quantification of the bands was performed using the program Image Lab 3.0.1 (Bio-  
217 Rad).

#### 218 **Plaque assay**

219 To assess plaque phenotype of the rVV, BSC-1 cells (6-well plate format, 10<sup>6</sup>  
220 cells/well) were infected with approximately 20 PFU per well. After 1 h infection, the  
221 medium was removed, and the infection was maintained for 48 h at 37°C under  
222 semisolid medium consisting of EMEM-2% FBS containing 1% low-melting point  
223 agarose. For fluorescence imaging, plates were photographed using the ChemiDoc™  
224 XRS + (Bio-Rad). Green and red fluorescent signals from GFP and Scarlet,  
225 respectively, were photographed using the software settings indicated for SYBR Green  
226 using 1 s and 2 s exposure, respectively. For detection of Nluc, 1ml of PBS with 100 µl  
227 of substrate (Nano-Glo luciferase assay system, Promega) was added per well and  
228 immediately photographed with the software option for Chemiluminescence with 40 s of  
229 exposure. Cell monolayers were subsequently fixed with 1ml of 4% formaldehyde for 30  
230 min at room temperature. After removing the semisolid medium, plaques were stained

231 with a solution of 5% crystal violet in methanol (v/v) (31) and photographed using White  
232 Epi Illumination for 0.1 s.

### 233 **Viral growth kinetics**

234 Viral growth kinetics were evaluated in BSC-1 cells (6-well plate format,  $10^6$   
235 cells/well, triplicates) infected at an MOI of 0.01. Viral replication at various times post-  
236 infection (24, 48, 72, and 96 h), was evaluated by phase contrast and fluorescence  
237 microscopy. In addition, at each time point, tissue culture supernatants were collected to  
238 determine viral titers and Nluc activity. Viral titers were determined by standard plaque  
239 assay (PFU/ml) followed by staining with crystal violet (31). Nluc activity was quantified  
240 using the Nano-Glo luciferase assay (Promega) following the manufacturer's  
241 recommendations using an EnSight (Perkin Elmer) bioluminescence plate reader.  
242 Microsoft Excel software was used to determine the mean value and standard deviation  
243 (SD).

### 244 **Fluorescence microscopy**

245 GFP and Scarlet fluorescence expression were detected using a Nikon Eclipse TE-  
246 2000-E inverted microscope. GFP expression was assessed using 465-495 nm  
247 (excitation) and 515-555 nm (emission) filters. Scarlet expression was detected using  
248 515-560 nm (excitation) and 600-650 nm (emission) filters. Images were acquired with a  
249 Photometrics PRIME SCMOS monochrome camera.

### 250 **Mice experiment**

251 All animal experiments were approved by the University of Rochester Institutional  
252 Biosafety (IBC) and Animal Care and Use (IACUC) Committees, which are in  
253 accordance with recommendations found in the Guide for the Care and Use of

254 Laboratory Animals of the National Research Council (32). Six-to-eight-weeks-old  
255 female BALB/c mice were purchased from the National Cancer Institute (NCI) and  
256 maintained at the University of Rochester animal care facility under specific-pathogen-  
257 free conditions. Mice were anesthetized intraperitoneally (i.p.) with ketamine-xylazine  
258 (100 mg/kg ketamine and 10 mg/kg xylazine) and infected intranasally (i.n.) with the  
259 indicated viral PFU. Mice (n = 6/group) were daily monitored for changes in morbidity  
260 (body weight loss) and mortality (survival) for 14 days (33-35). Mice losing more than  
261 25% of their initial body weight were considered to reach their end point and were  
262 humanely euthanized with carbon dioxide (CO<sub>2</sub>) and confirmed by cervical dislocation.  
263 The 50% mouse lethal dose (MLD<sub>50</sub>) was determined using the Reed and Muench  
264 method (36).

265 An IVIS Spectrum multispectral imaging instrument (Caliper Life Sciences, Inc.) was  
266 used for *in vivo* bioluminescence imaging of live mice and *ex vivo* imaging of lungs  
267 collected from mock-infected and VV infected animals. Six-to-eight-weeks-old female  
268 BALB/c mice (n = 4/group/day) were mock-infected (PBS) or infected i.n. with the  
269 indicated PFU. At the indicated days post-infection, mice were anesthetized with  
270 ketamine-xylazine (100 mg/kg ketamine and 10 mg/kg xylazine) and then retro-orbitally  
271 injected with 100 µl of Nano-Glo luciferase substrate (Promega) diluted 1:10 in PBS.  
272 Subsequently, mice were placed in an XIC-3 isolation chamber (Perkin Elmer) and  
273 imaged. Bioluminescence data collection and analysis were conducted using the Living  
274 Image software (v4.5; PerkinElmer). Flux measurements (Log<sub>10</sub> photons per second  
275 (p/s) were obtained from the region of interest (ROI) around the whole body of each  
276 mouse. A bioluminescence intensity (radiance; number of photons per second per

277 square centimeter per steradian; p/sec/cm<sup>2</sup>/sr) scale bar is displayed for each figure.  
278 Right after imaging, mice were removed from the XIC-3 isolation chamber and  
279 euthanized with a lethal dose of 2,2,2-tribromoethanol and exsanguination. Whole lungs  
280 were excised and washed with PBS. Scarlet or GFP expression were analyzed in the  
281 IVIS as previously described (15, 33, 37, 38). Living Image (v.4.5) software was used to  
282 acquire and analyze images to determine the radiant efficiency of the ROI.  
283 Fluorescence signals were normalized to those collected from mock-infected animals.  
284 Excised lungs from days 2, 4, and 6 post-infection were homogenized, and viral titers  
285 were determined by Median Tissue Culture Infectious Dose (TCID<sub>50</sub>).

#### 286 **Histopathology and pathology scoring**

287 Six-to-eight-weeks-old female BALB/c mice (n = 4) were infected (i.n.) with 10<sup>7</sup> PFU  
288 of the indicated viruses. Mice were sacrificed on days 2 and 4 post-infection, and lungs  
289 were slowly perfused with 10% neutral formalin and fixed for 2 days. Next, the lungs  
290 were washed three times in PBS before being gradually dehydrated by sequential  
291 immersion in 70%, 95%, and absolute ethanol. After that, lungs were transferred to  
292 xylenes and embedded in paraffin. Lungs were sectioned (5 μm) and placed on a hot  
293 plate to dissolve the paraffin, followed by sequential rehydration with 95% ethanol, 75%  
294 ethanol, and ddH<sub>2</sub>O. Once the lungs were rehydrated, slides were mounted with  
295 Vectashield media containing DAPI (Vector Laboratories) to stain the nucleus. Lung  
296 sections were incubated overnight with Alexa Fluor 448 rabbit anti-GFP (Thermo Fisher  
297 Scientific), mouse anti-RFP (Thermo Fisher Scientific) or a rabbit polyclonal antibody  
298 against VV A33R protein (BEI Resources, NR-628) to demonstrate that fluorescent  
299 reporter proteins and viruses can be alternatively detected with antibodies. The

300 following day, slides were incubated with rabbit anti-AF488 to amplify the GFP signal,  
301 Cy3 donkey anti-mouse IgG (Jackson ImmunoResearch Laboratories) to detect mouse  
302 monoclonal against Scarlet and with Alexa Fluor 647 donkey anti-rabbit IgG to detect  
303 the rVV. Slides were washed in PBS and mounted with Vectashield with DAPI (H-1200,  
304 Vector Laboratories). Representative pictures were taken with an Axioplan Zeiss  
305 Microscope and recorded with a Hamamatsu camera. Five randomly chosen  
306 independent anatomical locations from the lung sections were microscopically  
307 evaluated for histopathologic lesion scoring as previously described (39, 40). The  
308 histopathologic lesion scores included three different criteria (peri-bronchial &  
309 perivascular inflammation, intra-alveolar inflammation, and bronchial epithelial cell  
310 necrosis) and were graded on the basis of lesion severity as follows: grade 0 = no  
311 histopathological lesions; grade 1 = mild; grade 2 = moderate; grade 3 = marked; and,  
312 grade 4 = severe. A trained veterinary pathologist blindly performed all examinations at  
313 University of Rochester.

#### 314 **Flow cytometry**

315 Six-to-eight-weeks-old female BALB/c mice (n = 4) were infected (i.n.) with  $10^7$  PFU  
316 of the indicated viruses and at days 2 and 4 post-infection, mice were sacrificed, and  
317 the lungs were surgically excised. Immediately afterwards, lungs were enzymatically  
318 digested with 0.625 mg/ml of collagenase (Sigma, C-7657) and 750 units of DNase  
319 (Sigma) at 37°C for 30 minutes. Digested lungs were mechanically disrupted using  
320 metallic strainers. Cell suspensions were spun at 1,700 rpm for 4 min and red blood  
321 cells were lysed with ACK solution (0.15 M  $\text{NH}_4\text{Cl}$ , 1 mM  $\text{NaHCO}_3$ , 0.1 mM EDTA in  
322 PBS). Lived cells that excluded trypan blue were counted in a Neubauer chamber.

323 Then, 50  $\mu$ l of rat anti-CD16/CD32 (Fc block, clone 2.4 G2, Bioxcell, Lebanon NH), at 1  
324  $\mu$ g/ml, was added to the cell suspensions to prevent non-specific binding of  
325 fluorescently labeled antibodies. Cells were incubated for 15 min on ice with the  
326 following antibodies; Pe-Cy7 rat-anti-mouse CD45 (Clone 30-F11, Biolegend), PerCP-  
327 Cy5.5- rat anti-mouse IA-IE (Clone M5/114.15.2, Biolegend), APC mouse anti-mouse  
328 CD64 (Clone X54-5/7.1, Biolegend, San Diego, CA), APC-Cy7 rat anti-mouse CD11b  
329 (Clone M1/70, Biolegend, San Diego, CA), BV421 Armenian hamster anti-mouse  
330 CD11c (Clone N418, Biolegend, San Diego, CA), PE rat anti-mouse Ly6C (Clone  
331 HK1.4, Biolegend, San Diego, CA) AF700 rat anti-mouse Ly6G (Clone 1A8, Biolegend,  
332 San Diego, CA), biotin rat anti-mouse Siglec F (Clone S17007L, Biolegend, San Diego,  
333 CA). After incubation, cells were washed with FACS buffer (PBS containing 3% FBS  
334 and 2.5 mM of EDTA pH 7.4) and spun at 1,700 rpm for 4 min. Cells were incubated  
335 with Streptavidin PE-Cy5 (405205, Biolegend) for 10 min on ice, washed with FACS  
336 buffer, and then spun at 1,700 rpm for an additional 4 min. Lastly, cells were  
337 reconstituted with FACS buffer containing 1  $\mu$ g/ml of propidium iodide and collected in  
338 an LSRII flow cytometer. Flow cytometric analysis was performed in the FlowJo  
339 software.

#### 340 **Genetic stability of rVV**

341 To test the genetic stability of rVV, viruses were serially passaged 5 times in BSC-1  
342 cells (6-well plate format,  $10^6$  cells/well) and incubated for 48 h until cytopathic effect  
343 (CPE) was observed. First passage was initiated using an MOI of 0.1 and the inoculum  
344 of the successive passages were 1:20 dilutions of the crude virus preparation from the  
345 previous passage. After 5 consecutive passages, viruses were monitored for the

346 presence of fluorescence and luminescence using standard plaque assay. At least 50  
347 plaques were counted for each virus.

### 348 **Statistical analysis**

349 The One-way ANOVA or two-tailed paired/unpaired student's T-test were used for  
350 statistical analysis on Graphpad Prism or Microsoft Word software, respectively; \*  $p <$   
351 0.05, \*\*  $p < 0.01$ , \*\*\*  $p < 0.001$ , \*\*\*\*  $p < 0.0001$  or no significance (n.s.)

352

## 353 **RESULTS**

### 354 **Generation of rVV Nluc/Scarlet and rVV Nluc/GFP**

355 The rVV Nluc/Scarlet and rVV Nluc/GFP were generated by insertion of Nluc  
356 downstream the F13L locus and either Scarlet (rVV Nluc/Scarlet) or GFP (rVV  
357 Nluc/GFP) downstream of the A27L locus (**Figure 1**). Insertion of foreign reporter genes  
358 was accomplished by a selection method based on plaque formation that allows  
359 simultaneous introduction of two genes into the VV genome (27). The corresponding  
360 genomic regions around those genes are depicted for the reference VV WR strain and  
361 for the recombinant viruses (**Figure 1A**). Notably, the insertion is directed into intergenic  
362 regions (F13L/F12L and A27L/A26L) and did not cause any additional modifications of  
363 the viral genome (**Figure 1A**).

364 We first characterized the rVV by Western blot (**Figure 1B**). Total cell lysates from  
365 mock-, WR-, rVV Nluc/Scarlet-, or rVV Nluc/GFP-infected (MOI 0.05) BSC-1 cells were  
366 collected at 24 h post-infection and they were analyzed using antibodies specific for  
367 Nluc, Scarlet (anti-mCherry), and GFP. As expected, Western blot analysis revealed  
368 specific bands with the predicted molecular size for Nluc only in cell extracts from BSC-



369 1 cells infected with rVV Nluc/Scarlet or Nluc/GFP (**Figure 1B**). Furthermore, specific  
370 bands for Scarlet or GFP were only detected in cell extracts from rVV Nluc/Scarlet- or  
371 rVV Nluc/GFP-infected cells, respectively (**Figure 1B**). Antibodies against VV F13L and  
372 cellular actin were included as loading controls for viral infection and cellular  
373 housekeeping proteins, respectively (**Figure 1B**). As expected, we detected F13L only  
374 in VV-infected cell lysates, and the levels of F13L expression were similar between WR-  
375 , rVV Nluc/Scarlet-, and rVV Nluc/GFP-infected cells (**Figure 1B**). These results  
376 confirmed that each rVV expressed two reporter genes.

### 377 ***In vitro* characterization of reporter gene expression and viral replication of** 378 **rVV Nluc/Scarlet and rVV Nluc/GFP**

379 Next, we sought to assess whether the expression of reporter genes could be  
380 directly visualized by plaque assay and fluorescence microscopy (**Figure 2**). We  
381 conducted plaque assays on BSC-1 cell monolayers infected (~20 PFU/well) with WR,  
382 rVV Nluc/Scarlet, or rVV Nluc/GFP. After 2 days post-infection, plaques were detected  
383 by either crystal violet staining, fluorescence (GFP and Scarlet), or bioluminescence  
384 (Nluc) (**Figure 2A**). Crystal violet staining revealed plaques with similar sizes for WR,  
385 rVV Nluc/Scarlet, and rVV Nluc/GFP (**Figure 2A**). As expected, only rVV Nluc/Scarlet  
386 and rVV Nluc/GFP, but not WR, displayed fluorescent positive plaques, respectively,  
387 under direct fluorescent imaging (**Figure 2A**). Moreover, in the presence of Nluc  
388 substrate, both rVV Nluc/Scarlet and rVV Nluc/GFP, but not WR plaques, were  
389 detectable using bioluminescence (**Figure 2A**). When representative images were  
390 merged, fluorescent plaques colocalized with Nluc-positive plaques, indicative of rVV  
391 Nluc/Scarlet and rVV Nluc/GFP expressing both reporter genes (**Figure 2A**). Moreover,

392 Scarlet-, or GFP-, and Nluc-positive plaques colocalized with plaques detected by  
393 crystal violet, as indicated by red and green arrows, respectively (**Figure 2A**).  
394 Fluorescence expression of Scarlet and GFP in viral plaques from cells infected with  
395 rVV Nluc/Scarlet and rVV Nluc/GFP but not with WR, was further confirmed by imaging  
396 individual plaques under a fluorescence microscope (**Figure 2B**).

397 To evaluate the kinetics of reporter gene expression, BSC-1 cells were infected  
398 (MOI, 0.1) with WR, rVV Nluc/Scarlet, or rVV Nluc/GFP and red or green fluorescence  
399 expression in infected cells was directly observed under a fluorescence microscope at  
400 24, 48, 72, and 96 h post-infection (**Figure 2C**). Irrespective of the fluorescent protein  
401 used, signal was first detected after 24 h, progressively increased, and peaked at 72 h  
402 post-infection, with lower expression at 96 h post-infection, probably due to leakage  
403 from cells coincident with cytopathic effect (CPE) caused by viral infection (**Figure 2C**).  
404 By brightfield microscopy, WR-infected cells displayed viral-induced CPE similar to that  
405 of the rVV Nluc/Scarlet, or rVV Nluc/GFP but, as expected, fluorescence was only  
406 detected at background levels in WR-infected cells (**Figure 2C**).

407 Cell culture supernatants were also collected at the indicated time points to quantify  
408 viral titers (**Figure 2D**) and Nluc activity (**Figure 2E**). Viral titers in the tissue culture  
409 supernatants of BSC-1 cells infected with rVV Nluc/Scarlet or rVV Nluc/GFP were  
410 identical and comparable to those of WR-infected BSC-1 cells, with all viruses achieving  
411 similar viral titers at all times post-infection (**Figure 2D**). When we analyzed cell culture  
412 supernatants for Nluc activity, Nluc was detected as early as 24 h post-infection in BSC-  
413 1 cells infected with rVV Nluc/Scarlet or rVV Nluc/GFP (**Figure 2E**). Notably, Nluc  
414 expression levels increased in a time-dependent matter, peaking at 96 h post-infection,

415 most likely because the CPE caused by viral infection resulted in the release and  
416 accumulation of NLuc in the tissue culture supernatants from infected cells (**Figure 2E**).  
417 As expected, BSC-1 cells infected with WR did not show detectable levels of Nluc in the  
418 tissue culture supernatant, like those of mock-infected cells (**Figure 2E**).

### 419 **Pathogenicity of bi-reporter expressing rVV in BALB/c mice**

420 To be useful as a model for animal infection studies, it is critical that rVV retain the  
421 pathogenic potential of the unmodified virus. To assess whether rVV Nluc/Scarlet or rVV  
422 Nluc/GFP were pathogenic in mice, and to the level of WR, six-to-eight-week-old female  
423 BALB/c mice (n = 6/group) were inoculated i.n. with  $10^4$ ,  $10^5$ ,  $10^6$ , and  $10^7$  PFU/mice of  
424 rVV Nluc/Scarlet, rVV Nluc/GFP, or WR (**Figure 3**). Then, body weight (**Figure 3A**) and  
425 survival (**Figure 3B**) were daily monitored for 14 days. No significant body weight loss  
426 was observed in mice inoculated with  $10^4$  PFU of rVV Nluc/Scarlet, rVV Nluc/GFP, or  
427 WR (**Figure 3A**). However, mice inoculated with  $10^5$  PFU of rVV Nluc/Scarlet, rVV  
428 Nluc/GFP, or WR, lost 15-20% of their initial body weight (**Figure 3A**). Mice infected  
429 with  $10^6$  PFU and  $10^7$  PFU of rVV Nluc/Scarlet, rVV Nluc/GFP, or WR, drastically lost  
430 body weight (**Figure 3A**), and all succumbed to viral infection (**Figure 3B**), with those  
431 infected with  $10^7$  PFU succumbing faster, compared to the rest of the groups. Notably,  
432 the 50% mouse lethal dose (MLD<sub>50</sub>) of rVV Nluc/Scarlet and rVV Nluc/GFP ( $10^{5.25}$  PFU)  
433 was comparable to the MLD<sub>50</sub> of WR ( $10^5$  PFU) (**Figure 3B**). These findings indicate  
434 that insertion of reporter genes Nluc/Scarlet or Nluc/GFP did not affect the virulence of  
435 rVV Nluc/Scarlet and rVV Nluc/GFP, respectively, as compared to WR.

### 436 ***In vivo* kinetics of rVV Nluc/Scarlet and rVV Nluc/GFP infection**

437 Since detecting fluorescent proteins *in vivo* using *in vivo* imaging is challenging  
438 because its intensity often quenches in live tissues (21, 41), we focused on evaluating  
439 the dynamics of rVV Nluc/Scarlet and rVV Nluc/GFP infection in mice by  
440 bioluminescence (Nluc). BALB/c mice (n = 4/group) were i.n. infected with  $10^4$ ,  $10^5$ ,  $10^6$ ,  
441 and  $10^7$  PFU/mice of rVV Nluc/Scarlet, rVV Nluc/GFP, or WR, and bioluminescence  
442 was monitored every 2 days, for 14 days (**Figure 4**). Bioluminescent imaging of the  
443 same mice infected with  $10^4$  (**Figure 4A**),  $10^5$  (**Figure 4B**),  $10^6$  (**Figure 4C**), and  $10^7$   
444 (**Figure 4D**) PFU allowed us to temporally visualize viral infection and determine the  
445 bioluminescence signal intensities as total flux (log<sub>10</sub> photons per second (p/s) (**Figure**  
446 **4E**). Nluc expression was readily detected in mice infected with the highest doses ( $10^6$   
447 and  $10^7$  PFU) of rVV Nluc/Scarlet and rVV Nluc/GFP as early as day 2 post-infection,  
448 although the Nluc intensity signal was higher in those animals infected with  $10^7$  PFU of  
449 rVV Nluc/Scarlet and rVV Nluc/GFP. Nluc expression in mice infected with  $10^5$  PFU of  
450 rVV Nluc/Scarlet and rVV Nluc/GFP was observed after 4 days post-infection, while  
451 Nluc signal was detected after 6 days post-infection in mice infected with  $10^4$  PFU of  
452 rVV Nluc/Scarlet and rVV Nluc/GFP. Peak of Nluc expression in mice infected with  $10^7$   
453 PFU of rVV Nluc/Scarlet and rVV Nluc/GFP was observed at 4 days post-infection. In  
454 this case, mice could not be monitored at later times post-infection since all of them  
455 succumbed to viral infection (**Figures 4D and 4E**). In the case of mice infected with  $10^6$   
456 PFU of rVV Nluc/Scarlet and rVV Nluc/GFP, maximum levels of Nluc expression were  
457 detected at days 4-6 post-infection and could not be monitored at later times post-  
458 infection since all of them succumbed to viral infection (**Figures 4C and 4E**). Mice  
459 infected with  $10^5$  PFU of rVV Nluc/Scarlet and rVV Nluc/GFP showed maximum levels

460 of Nluc expression between days 4-8 post-infection, and we were able to monitor Nluc  
461 levels of expression during the entire experiment since all the mice survived infection  
462 (**Figures 4B and 4E**). Finally, mice infected with  $10^4$  PFU of rVV Nluc/Scarlet and rVV  
463 Nluc/GFP showcased detectable peak in Nluc expression at days 8-12 post-infection  
464 (**Figures 4A and 4E**), and all the mice survived viral infection.

#### 465 ***In vivo* fluorescence and Nluc expression, and correlation with viral infection**

466 A major advantage of our dual reporter-expressing rVV is that they harbor both  
467 bioluminescent and fluorescent reporter genes. Therefore, either one could be used as  
468 a valid surrogate of viral infection. To demonstrate a direct correlation between  
469 bioluminescent (Nluc) and fluorescent (Scarlet or GFP) *in vivo* and *ex vivo*, respectively,  
470 we infected BALB/c mice (n = 4/group) with  $10^4$  (**Figure 5A**),  $10^5$  (**Figure 5B**),  $10^6$   
471 (**Figure 5C**), and  $10^7$  (**Figure 5D**) PFU/mice of rVV Nluc/Scarlet, rVV Nluc/GFP, or WR.  
472 We then assessed Nluc expression at days 2, 4, and 6 post-infection using *in vivo*  
473 imaging. Immediately after imaging, mice were euthanized, and lungs were collected to  
474 quantitate Scarlet (rVV Nluc/Scarlet) or GFP (rVV Nluc/GFP) expression in the lungs  
475 using *ex vivo* imaging. Similar to our previous results, we did not detect Nluc expression  
476 in mice that were infected with  $10^4$  PFU of either rVV Nluc/Scarlet or rVV Nluc/GFP  
477 (**Figure 5A**). Some mice infected with  $10^4$  PFU of rVV Nluc/Scarlet or rVV Nluc/GFP  
478 showed a minimal Nluc signal at day 6 post-infection (**Figure 5A**). Likewise, we could  
479 not detect Scarlet or GFP expression in the lungs of mice infected with  $10^4$  PFU of rVV  
480 Nluc/Scarlet or rVV Nluc/GFP, respectively (**Figure 5A**). Nluc was readily detected in  
481 mice inoculated with higher doses of rVV Nluc/Scarlet or rVV Nluc/GFP ( $10^5$ ,  $10^6$ , or  $10^7$   
482 PFU). In mice infected with  $10^5$  PFU, Nluc was detected by day 4 post-infection (**Figure**

483 **5B**). In contrast, Nluc was detected as early as two days post-infection in mice infected  
484 with  $10^6$  and  $10^7$  PFU, respectively (**Figures 5C and 5D**). *Ex vivo* imaging of  
485 fluorescent expression in excised lungs correlated with levels of Nluc expression.  
486 Scarlet and GFP expression were detected by day 4 post-infection in mice infected with  
487  $10^5$  PFU of rVV Nluc/Scarlet or rVV Nluc/GFP (**Figure 5B**); and as early as 2 days post-  
488 infection in mice infected with  $10^6$  and  $10^7$  PFU of rVV Nluc/Scarlet or rVV Nluc/GFP,  
489 respectively (**Figures 5C and 5D**). We also determined viral titers from homogenized  
490 lungs (**Figure 5E**). As expected, viral titers were higher in mice infected with  $10^7$  PFU of  
491 rVV Nluc/Scarlet or rVV Nluc/GFP, while the lowest viral titers were observed in mice  
492 infected with  $10^4$  PFU of rVV Nluc/Scarlet or rVV Nluc/GFP (**Figure 5E**). Median Tissue  
493 Culture Infectious Dose (TCID<sub>50</sub>) values in mice infected with  $10^4$ ,  $10^5$ ,  $10^6$ , and  $10^7$  PFU  
494 of rVV Nluc/Scarlet or rVV Nluc/GFP were within those observed in mice infected with  
495 the same viral doses of WR (**Figure 5E**). Lastly, Nluc levels of expression correlated  
496 with both Nluc signal detected in whole mice and viral titers (**Figure 5F**).

#### 497 **Direct visualization of rVV Nluc/Scarlet and rVV Nluc/GFP in mice lungs**

498 One of the practical applications of viruses expressing fluorescent reporter genes is  
499 the rapid and easy detection of the pathogen without the need for additional reagents to  
500 identify the presence of the virus in infected cells. In addition, the resolution of  
501 microscopical imaging using fluorescent reporters allows identifying individual positive  
502 cells without the need for antibody staining. Thus, we decided to visualize the spatial  
503 distribution of the VV and their cellular targets in formalin-fixed, paraffin-embedded lung  
504 sections of BALB/c mice (n = 4) infected with  $10^7$  PFU of rVV Nluc/Scarlet or rVV  
505 Nluc/GFP at days 2 and 4 post-infection by examining Scarlet and GFP expression,

506 respectively (**Figure 6**). As expected, we did not find a fluorescent signal in the lungs of  
507 mock-infected mice or in mice infected with WR (**Figure 6A**). However, lung sections  
508 from rVV Nluc/Scarlet- and rVV Nluc/GFP-infected mice displayed red and green  
509 fluorescent signals, respectively. Although some epithelial bronchi were virus-free, we  
510 observed a progressive increase in fluorescent signals in the airways between days 2  
511 and 4 post-infection (**Figure 6A**). As a result of the fixation process, in certain instances,  
512 fluorescence intensity might be drastically diminished. To overcome this problem,  
513 researchers have used antibodies specific for fluorescent proteins to identify sites of  
514 viral infection. Therefore, we stained lung sections of mice infected with rVV  
515 Nluc/Scarlet or rVV Nluc/GFP with antibodies specific for Scarlet (mCherry) or GFP,  
516 respectively (**Figure 6B**). Of note, lung samples from mock- or WR-infected mice were  
517 negative for Scarlet and GFP (**Figure 6B**). In contrast, Scarlet and GFP expression  
518 were enhanced by specific antibodies and were mainly located in the airways of the  
519 lung tissues (**Figure 6B**). As we predicted, viral infection was detected using a specific  
520 antibody against VV in the lung sections of all mice groups infected with WR, rVV  
521 Nluc/Scarlet, or rVV Nluc/GFP, but not in mock-infected animals (**Figure 6C**). The  
522 staining patterns observed after direct visualization of Scarlet or GFP expression from  
523 reporter-expressing viruses (**Figure 6A**), incubation with antibodies against fluorescent  
524 proteins (**Figure 6B**), or VV (**Figure 6C**) were similar and indicative of epithelial cell  
525 infections in the bronchial airways (**Figures 6A-6C**). Lastly, a morphometric analysis of  
526 the area infected by WR, rVV Nluc/Scarlet, or rVV Nluc/GFP at days 2 and 4 post-  
527 infection revealed a significant 4-fold increase in the percentage of area covered by the  
528 fluorescent signal on day 4 post-infection (**Figure 6D**).

529 **Pathological changes in mice lungs infected with dual reporter-expressing rVV**

530 We next evaluated the ability of rVV Nluc/Scarlet and rVV Nluc/GFP to induce  
531 pathological changes in the lungs of infected ( $10^7$  PFU) BALB/c mice ( $n = 4$ ) and  
532 compared to those caused by WR infection, and mock-infected animals (**Figure 7**).  
533 Lungs of mice infected with either rVV Nluc/Scarlet, rVV Nluc/GFP, or WR, showed mild  
534 to moderate bronchopneumonia (**Figure 7A**). Blind assessment of pathological  
535 pulmonary features confirmed our preliminary observations and showed comparable  
536 inflammatory cell infiltration around bronchi and blood vessels (**Figures 7A and 7B**,  
537 blue arrows). Accumulation of inflammatory cells in the intra-alveolar space was  
538 significantly higher in WR-infected mice compared to rVV Nluc/Scarlet and rVV  
539 Nluc/GFP infected animals at day 2 post-infection, but was not statistically different by  
540 day 4 post-infection (**Figures 7A and 7C**, green arrowheads). Bronchial epithelial cell  
541 necroses were similar in mice infected with WR and dual reporter expressing rVV  
542 Nluc/Scarlet, or rVV Nluc/GFP (**Figures 7A and 7D**, black arrows).

543 **Identification of the cell type targeted by VV in BALB/c mice**

544 To identify the cellular targets of VV in infected mice, we enumerated and calculated  
545 the proportion of immune cell subsets ( $CD45^-$ ) and stromal cells ( $CD45^+$ ) in the lung of  
546 mice infected with  $10^7$  PFU of rVV Nluc/GFP by flow cytometry (**Figure 8**). We excluded  
547 dead cells and doublets from the flow cytometry analysis to detect exclusively live  
548 macrophages ( $CD45^+CD11b^+CD64^+$ ), neutrophils ( $CD45^+CD11b^+Ly6G^+$ ), monocyte-  
549 derived dendritic cells ( $CD45^+CD11c^+IA^{b+}CD11b^+Ly6C^{int}$ ), monocyte undifferentiated  
550 macrophages ( $CD45^+CD11c^+IA^{b/low}CD11b^+Ly6C^{int}$ ) and interstitial macrophages  
551 ( $CD45^+CD11b^+IA^{b+}CD6^{int/hi}$ ) that have active viral infection by assessing GFP reporter



552 expression (**Supplementary Figure 1**). Consistent with the progressive spread of viral  
553 infection in the airways, we found a significant increase in the proportion of CD45<sup>-</sup>  
554 stromal cells infected from days 2 to 4 post-infection (**Figure 8A**, day 2; 2.7% CD45<sup>-</sup>  
555 GFP<sup>+</sup> vs. day 4; 52% CD45<sup>-</sup>GFP<sup>+</sup>). The frequency and total number of monocytes  
556 undifferentiated macrophages (day 2; 40.5% vs. day 4; 31.3%), monocyte-derived  
557 dendritic cells (day 2; 31.5% vs. day 4; 11.3%) and interstitial macrophages (day 2;  
558 12.3% vs. day 4; 3.4%) infected by rVV Nluc/GFP was lower at day 4 compared to day  
559 2 post-infection (**Figures 8A and 8B**). In contrast, infected macrophages (day 2; 8% vs.  
560 day 4; 29.2%) and neutrophils (day 2; 7.5% vs. day 4; 24.8%) increased at day 4 post-  
561 infection, which may be associated with the differentiation of monocytes into  
562 macrophages in the infected lungs (**Figures 8A and 8B**). Yet, both rVV Nluc/GFP and  
563 WR efficiently induced an innate immune response in the lung of infected mice. rVV  
564 Nluc/GFP induced significant accumulation of macrophages and interstitial  
565 macrophages (day 2), monocyte-derived dendritic cells, and monocytes undifferentiated  
566 macrophages (day 4) compared to WR-infected mice. Intriguingly, we observed a  
567 decrease of total macrophages and neutrophils at day 4 post-infection that may be  
568 associated with the increase in viral infection (**Figure 8B**).

569 Next, we performed immunofluorescence staining to identify the spatial distribution  
570 of innate cells at the site of infection. To visualize the location of neutrophils relative to  
571 the infected airways, we stained lung sections with antibodies specific for Ly6G, VV,  
572 and GFP to detect neutrophils, WR, and rVV Nluc/GFP, respectively. In the lungs of  
573 mock-infected mice, we observed most neutrophils accumulated in the interstitial space,  
574 while very few were near the airways (**Figure 8C**, left panels). In contrast, many

575 neutrophils accumulated around airways in mice infected with WR or rVV Nluc/GFP  
576 (**Figure 8C**, middle and right panels). Consistent with our preliminary observations, the  
577 number of neutrophils significantly increased around the airways in mice infected with  
578 WR or rVV Nluc/GFP (**Figure 8D**). The number of neutrophils infiltrating the peri-  
579 bronchial areas was similar in mice infected with either WR or rVV Nluc/GFP (**Figure**  
580 **8D**).

### 581 **Stability of rVV Nluc/Scarlet and rVV Nluc/GFP**

582 A critical concern with reporter-expressing recombinant viruses is their genetic  
583 instability that might lead to the loss of correct marker gene expression. To test the  
584 stability of our bi-reporter constructs, we serially passaged both, rVV Nluc/Scarlet and  
585 rVV Nluc/GFP, as well as WR, in cultured cells for a total of 5 passages. Next, virus  
586 progeny obtained from passage 5 was evaluated by plaque assay and monitored for  
587 reporter gene expression (**Figure 9**). Results indicate that rVV Nluc/Scarlet and rVV  
588 Nluc/GFP were genetically stable since both recombinant viruses displayed the  
589 expected fluorescent (Scarlet and GFP) and bioluminescence (Nluc) expression (**Figure**  
590 **9**).

591

592

593

594

595

596

597

598

599

600

601

602

603

604

605

606 **DISCUSSION**

607 Previous studies, including ours, have described reporter-expressing rVV encoding  
608 either fluorescent or luciferase reporter genes to study the biology of VV and to evaluate  
609 the efficacy of new antivirals or NAbs to inhibit or neutralize, respectively, viral infection  
610 (24, 42, 43). However, and based on the different properties of fluorescent and  
611 luciferase proteins, the use of these reporter-expressing rVV is limited to the properties  
612 of the reporter gene (15, 41, 44). *In vitro*, fluorescent proteins represent a better option  
613 to detect the presence of rVV in infected cells (14-17). However, luciferase proteins  
614 represent a better tool for quantitative purposes (19-21, 45). *In vivo*, luciferase reporter  
615 genes represent the best option for whole-animal imaging (20, 41), while fluorescent  
616 proteins are better for *ex vivo* imaging and identifying viral cellular targets (15, 46).  
617 Thus, rVV expressing only one reporter gene does not allow to take advantage of the  
618 different properties of fluorescent and luciferase proteins and, therefore, the properties  
619 of the reporter fluorescent or luciferase proteins must be carefully considered in the  
620 experimental design.

621 Here, we have described the generation of novel rVV stably expressing two different  
622 reporter fluorescent and luciferase genes to overcome the current limitations of using  
623 single reporter-expressing rVV (**Figure 1**). We previously demonstrated the feasibility  
624 and advantages of generating bi-reporter influenza A virus (IAV) (37, 38) and the  
625 prototype arenavirus lymphocytic choriomeningitis virus (LCMV) (47). This new dual  
626 reporter-expressing rVV possess the advantages of both fluorescent and luciferase  
627 reporters, which could provide promising applications for the study of VV *in vitro* and *in*  
628 *vivo*. Notably, the expression of two foreign genes from different loci in the viral genome  
629 opens the possibility of improving the vaccine vector capability features of VV.

630 We found that our bi-reporter expressing rVV have similar growth kinetics and  
631 plaque phenotype in cultured cells than the parental WR strain (**Figure 2**). Importantly,  
632 only rVV expressing both reporter genes were detectable by fluorescence microscopy  
633 or bioluminescence due to its expression of GFP or Scarlet, and Nluc, respectively.  
634 Infection with rVV expressing both reporter genes was visualized in real time, without  
635 the need of complex protocols (e.g. staining with antibodies) needed to detect the  
636 presence of parental VV strains in infected cells. Moreover, reporter gene expression  
637 correlated to viral replication, demonstrating the feasibility of using either the fluorescent  
638 or luciferase reporter genes as valid surrogates of infection. In 2018, the United States  
639 FDA-approved the use of tecovirimat (TPOXX) to treat poxvirus infections (3). However,  
640 additional antivirals for the efficient treatment of poxvirus infections are urgently needed.  
641 Thus, discovering novel antivirals and implementing rapid and sensitive screening  
642 assays amenable to HTS will accelerate the identification and characterization of novel  
643 anti-poxvirus compounds. Antiviral drug discovery against poxvirus infection will benefit

644 of rVV expressing both fluorescent and luciferase proteins where identification of  
645 antivirals will be based on orthogonal assays based on inhibition of both reporter genes,  
646 similar to our previous studies with bi-reporter IAV (38) and LCMV (47). Likewise, these  
647 bi-reporter expressing rVV represent an excellent option to assess the neutralizing  
648 capacity of antibodies in HTS settings, as previously described for IAV (38, 48).

649 *In vivo*, the dual reporter-expressing rVV retained parental WR-like morbidity and  
650 mortality, with animals losing body weight and succumbing to viral infection,  
651 respectively, similar to those infected with WR (**Figure 3**). Notably, the bi-reporter  
652 expressing rVV represent a powerful tool to visualize viral infection *in vivo* (Nluc)  
653 (**Figure 4**) or *ex vivo* (Scarlet and GFP) (**Figure 5**). When we imaged mice infected with  
654 rVV Nluc/Scarlet or rVV Nluc/GFP using IVIS, Nluc signal was easily detectable and  
655 quantifiable, revealing the dynamics of VV infection using different doses of viral  
656 inoculum (**Figure 4**). Importantly, Nluc activity was time and viral dose dependent and  
657 allowed us to longitudinally follow and measure viral replications dynamics in the same  
658 live animals during the progression of natural viral infection. Likewise, the excised lungs  
659 from mice infected with rVV Nluc/Scarlet and rVV Nluc/GFP displayed Scarlet or GFP  
660 expression, respectively, where fluorescent signals were also time and viral dose-  
661 dependent (**Figure 5**). In addition, fluorescent protein expression allowed us to identify  
662 individually infected cells using fluorescent imaging and flow cytometry (**Figure 6**) and  
663 to assess the pathology of viral infections in the lungs of infected mice (**Figure 7**).  
664 Importantly, we observed a spatial and temporal correlation between Nluc and  
665 fluorescent expression (Scarlet or GFP), which correlated with viral replication in the  
666 lungs of infected mice (**Figure 5**). Finally, we identified the major primary cellular targets

667 of VV *in vivo* by combining the identification of GFP+ cells with flow cytometry-based  
668 approaches (**Figure 8**).

669 Altogether, rVV stably expressing both fluorescent and luciferase reporter genes  
670 represent an excellent tool for studying the biology of VV *in vitro* or *in vivo*. Expression  
671 of both reporter genes adds the advantages of using individual fluorescent- or  
672 luciferase-expressing rVV and represent an excellent option for the identification of  
673 therapeutics against poxviruses. Moreover, our studies with VV provide proof-of-  
674 concept for the feasibility of using a similar approach with other poxviruses, or DNA  
675 viruses, to facilitate their study in cultured cells or in validated animal models of  
676 infection.

677

678

679

680

681

682

683

684

685

686

687

688

689

690

691

692

693

694

695

696

697

698 **ACKNOWLEDGMENTS**

699 We want to thank BEI Resources for providing reagents. We also want to thank Drs.  
700 Hiller and Alcamí for providing antibodies. This work was supported by grants E-  
701 RTA2014-00006, RTA2017-0066 from Ministerio de Economía y Competitividad and  
702 Ministerio de Ciencia, Innovación y Universidades as part of the Plan Estatal de  
703 Investigación Científica, Desarrollo e Innovación Tecnológica, and grant COV20-00901  
704 from Instituto de Salud Carlos III (ISCIII).

705

706

707

708

709

710

711

712

713

714

715

716

717

718

719

720

721 **FIGURE LEGENDS**

722 **Figure 1. Generation of bi-reporter expressing rVV. A) Schematic representation**

723 **of WR (top), rVV Nluc/Scarlet (middle), and rVV Nluc/GFP (bottom) viral genomes:**

724 Insertion sites downstream of the A27L (left) and F13L (right) genes in the viral genome

725 are shown. Scarlet fluorescent protein (Scarlet; red), green fluorescent protein (GFP;

726 green), and Nano luciferase (Nluc; blue) are shown. Fluorescent Scarlet and GFP were

727 cloned downstream A27L (left). Nluc was cloned downstream F13L (right). Fluorescent

728 Scarlet and GFP, and Nluc are expressed from an early/late VV synthetic promoter

729 (black triangles). Gray boxes indicate the position of recombination flanks included in

730 the plasmid to direct insertion in the VV genome. **B) Reporter gene expression:** Cell

731 extracts from mock, WR, rVV Nluc/Scarlet and rVV Nluc/GFP infected (MOI 0.05) BSC-

732 1 cells were collected at 24 h post-infection and analyzed for Nluc, Scarlet, and GFP

733 expression by Western blot. An antibody against VV F13L and an antibody against actin

734 were used as viral and cellular protein loading controls, respectively. The molecular size

735 (kD) of the cellular/viral proteins are indicated on the left



736 **Figure 2. *In vitro* characterization of bi-reporter expressing rVV. A) Plaque assay:**  
737 Representative images of WR (left), rVV Nluc/Scarlet (middle) and rVV Nluc/GFP  
738 (right) plaques in BSC-1 cells at 2 days post-infection are shown. Plaques were  
739 detected by crystal violet staining, Scarlet or GFP (fluorescence), and Nluc expression.  
740 Merged images are shown at the bottom. Red (rVV Nluc/Scarlet) and green (rVV  
741 Nluc/GFP) arrows show the superimposed images of fluorescence, respectively, and  
742 the crystal violet and Nluc-expressing plaques. **B) Fluorescence of individual**  
743 **plaques:** Plaques from BSC-1 cells infected with WR (left), rVV Nluc/Scarlet (middle) or  
744 rVV Nluc/GFP (right) were imaged using brightfield (top) or fluorescent (bottom)  
745 microscopy. **C) Fluorescent expression kinetics:** BSC-1 cells infected (MOI, 0.01)  
746 with WR (top), rVV Nluc/Scarlet (middle), or rVV Nluc/GFP (bottom) were observed  
747 using brightfield (top) and red (Scarlet, middle) and green (GFP, bottom) fluorescence  
748 microscopy at the indicated times post-infection. Representative images were taken at  
749 200x magnification. Scale bars 0.5 mm. **D) Multicycle viral growth kinetics:** Tissue  
750 culture supernatants from BSC-1 cells infected (MOI, 0.01) with WR, rVV Nluc/Scarlet,  
751 or rVV Nluc/GFP were collected at the indicated times post-infection and assessed for  
752 the presence of virus by plaque assay. Data represent the mean and standard deviation  
753 of triplicates. The dotted line indicates the limit of detection (LOD, 10 PFU/ml). n.s: not  
754 significant differences. **E) Nluc expression:** Tissue culture supernatants from cells  
755 infected in panel D were used to determine levels of Nluc expression. RLU: relative light  
756 units. One-way ANOVA was used for statistical analysis; \*\*\*\* p < 0.0001.

757 **Figure 3. Virulence of bi-reporter rVV in mice:** Six-to-eight-week-old female BALB/c  
758 mice (n = 6) were i.n. infected with the indicated viral doses ( $10^4$ ,  $10^5$ ,  $10^6$ , or  $10^7$

759 PFU/mice) of WR (left), rVV Nluc/Scarlet (middle) or rVV Nluc/GFP (right). Body weight  
760 loss **(A)** and survival **(B)** were monitored for 14 days. Data represent the mean and  
761 standard deviation for each group of mice. The MLD<sub>50</sub> of each virus is indicated in panel  
762 B.

763 **Figure 4. *In vivo* kinetics of bi-reporter expressing rVV:** Six-to-eight-week-old  
764 female BALB/c mice (n = 4) were infected i.n. with 10<sup>4</sup> **(A)**, 10<sup>5</sup> **(B)**, 10<sup>6</sup> **(C)**, or 10<sup>7</sup> **(D)**  
765 PFU of WR (left), rVV Nluc/Scarlet (middle), or rVV Nluc/GFP (right). Nluc activity was  
766 evaluated every 2 days for 14 days (representative images of a single mouse per time  
767 point are shown). Radiance (number of photons per second per square centimeter per  
768 steradian, p/sec/cm<sup>2</sup>/sr) is shown for each mouse and time point. Bioluminescence  
769 signal was quantified and expressed as the total flux (log<sub>10</sub> photons per second, p/s) **(E)**.  
770 Error bars indicate the mean and standard deviation of each group of mice. One-way  
771 ANOVA was used for statistical analysis; \* p < 0.05, \*\* p < 0.01, \*\*\* p < 0.001, \*\*\*\* p <  
772 0.0001 or no significance (n.s.). The line represents the geometric mean.

773 **Figure 5. *In vivo* correlation of fluorescence (Scarlet and GFP) and Nluc**  
774 **expression with viral infection:** Six-to-eight-week-old female BALB/c mice (n = 4)  
775 were i.n. infected with 10<sup>4</sup> **(A)**, 10<sup>5</sup> **(B)**, 10<sup>6</sup> **(C)**, or 10<sup>7</sup> **(D)** PFU of WR (left), rVV  
776 Nluc/Scarlet (middle), or rVV Nluc/GFP (right). Nluc activity (top) was determined at  
777 days 2, 4, and 6 post-infection in live mice. Representative images of a single mouse  
778 per time point and p/sec/cm<sup>2</sup>/sr values of all mice per time point are shown. After *in vivo*  
779 imaging, lungs were harvested to access Scarlet (middle) or GFP (bottom) expression.  
780 Viral titers in the lungs of the same mice shown in panels A-D were determined by  
781 TCID<sub>50</sub> **(E)**. Error bars indicate the mean and standard deviation of each group of mice.

782 Bioluminescence signal was quantified and expressed as the total flux ( $\log_{10}$  photons per  
783 second, p/s) **(F)**. Error bars indicate the mean and standard deviation of each group of  
784 mice. The One-way ANOVA was used for statistical analysis; \*  $p < 0.05$ , \*\*  $p < 0.01$ , \*\*\*  
785  $p < 0.001$ , \*\*\*\*  $p < 0.0001$  or no significance (n.s.). The line represents the geometric  
786 mean.

787 **Figure 6. Direct visualization of viral infection in lungs of BALB/c mice infected**  
788 **with bi-reporter expressing rVV:** Six-to-eight-weeks-old female BALB/c mice ( $n = 4$ )  
789 were mock-infected or infected with  $10^7$  PFU of WR, rVV Nluc/Scarlet, or rVV Nluc/GFP.  
790 Mice were sacrificed on days 2 and 4 post-infection and lungs were harvested to assess  
791 fluorescent Scarlet and GFP expression. Representative images from lungs of mock-  
792 infected and mice infected with WR, rVV Nluc/GFP, or rVV Nluc/Scarlet viruses on days  
793 2 and 4 without immunostaining **(A)**, stained with antibodies against Scarlet or GFP **(B)**  
794 or a rabbit polyclonal antibody against VV **(C)** are shown. Airways are noted with an  
795 asterisk. Scale bars 100  $\mu\text{m}$ . Morphometric analyses of the infected bronchi in these  
796 experiments are also shown **(D)**. One-way ANOVA was used for statistical analysis; \*  $p$   
797  $< 0.05$ , \*\*  $p < 0.01$ , \*\*\*  $p < 0.001$ , or no significance (n.s.). The line represents the  
798 geometric mean.

799 **Figure 7. Pathological changes in the lungs of mice infected with the bi-reporter**  
800 **expressing rVV:** Six-to-eight-weeks-old female BALB/c mice ( $n = 4$ ) were mock-  
801 infected or infected i.n. with  $10^7$  PFU of WR, rVV Nluc/Scarlet, or rVV Nluc/GFP. At days  
802 2 and 4 post-infection, mice were sacrificed, and lung samples were collected for  
803 blinded histopathologic examination **(A)** and scoring **(B-D)**. Lung infected with WR, rVV  
804 Nluc/Scarlet, and rVV Nluc/GFP showed multifocal to locally extensive mild to moderate

805 peribronchial & perivascular inflammation (**A**, green arrow), intra-alveolar inflammations  
806 (**A**, blue arrowhead), and bronchial epithelial cell necrosis (**A**, black arrow). Mock-  
807 infected mice showed no lesions. Airways are noted with an asterisk. Scale bars 50  $\mu$ m.  
808 The histopathologic lesion scoring from peribronchial & perivascular inflammations (**B**),  
809 intra-alveolar inflammation (**C**) and bronchial epithelial cell necrosis (**D**) were graded  
810 base on lesion severity as follows: grade 0 = no histopathological lesions observed;  
811 grade 1 = mild; grade 2 = moderate; grade 3 = marked; and grade 4 = severe. One-way  
812 ANOVA was used for statistical analysis; \*  $p < 0.05$ , \*\*  $p < 0.01$ , \*\*\*  $p < 0.001$ , or no  
813 significance (n.s.). The line represents the geometric mean.

814 **Figure 8. Identification of cells infected with rVV:** Six-to-eight-weeks-old female  
815 BALB/c mice (n = 4) were mock-infected or infected i.n. with  $10^7$  PFU of WR or rVV  
816 Nluc/GFP. At days 2 and 4 post-infection, lungs were harvested, enzymatically and  
817 mechanically dissociated into single-cell suspensions, and the composition of GFP-  
818 positive cells was evaluated by flow cytometry. Pie charts represent distinguished  
819 CD45<sup>-</sup> stromal cells, CD45<sup>+</sup> hematopoietic cells, and innate immune cells responsive to  
820 rVV Nluc/GFP from infected mice at days 2 or 4 post-infection (**A**). The total number of  
821 interstitial macrophages, monocyte-derived DC, monocytes/undifferentiated  
822 macrophages, neutrophils and macrophages in the lungs from mock-infected and  
823 infected with WR or rVV Nluc/GFP mice is shown (**B**). The spatial distribution of  
824 infiltrating neutrophils in mock-infected and WR or rVV Nluc/GFP mice are shown (**C**).  
825 Ly6G<sup>+</sup> neutrophils are shown in red. WR infected cells are shown in white. rVV  
826 Nluc/GFP infected cells are shown in green. Scale bars 100  $\mu$ m. Airways are noted with  
827 an asterisk. Representative images are shown. The morphometric analysis depicts the

828 average number of Ly6G+ neutrophils per 200x fields in the site of infection **(D)**. The  
829 One-way ANOVA was used for statistical analysis; \*  $p < 0.05$ , \*\*  $p < 0.01$ , \*\*\*  $p < 0.001$ ,  
830 or no significance (n.s.).

831 **Figure 9. Stability of rVV Nluc/Scarlet and rVV Nluc/GFP:** rVV Nluc/Scarlet and rVV  
832 Nluc/GFP were serially passaged 5 times in BSC-1 cells. Parental WR was also  
833 passaged 5 times as internal control. Passage 5 WR, rVV Nluc/Scarlet and rVV  
834 Nluc/GFP were analyzed by plaque assay in BSC-1. Representative images of WR  
835 (left), rVV Nluc/Scarlet (middle) and rVV Nluc/GFP (right) plaques in BSC-1 cells at 2  
836 days post-infection are shown. Plaques were detected by crystal violet staining, Scarlet  
837 or GFP (fluorescence), and luciferase (Nluc) expression. Merged images are shown at  
838 the bottom. Red (rVV Nluc/Scarlet) and green (rVV Nluc/GFP) arrows show the co-  
839 localization of Scarlet or GFP fluorescence, respectively, with crystal violet and Nluc  
840 viral plaques.

841

842

843

844

845

846

847

848

849

850

851

852

853

854

855

856

857

858

859

860

#### 861 **SUPPLEMENTARY FIGURE LEGENDS**

#### 862 **Supplementary Figure 1. Flow cytometry gating strategy used to identify different**

863 **cell subsets during rVV Nluc/GFP infection:** Six-to-eight-weeks-old female BALB/c

864 mice (n = 4) were i.n. infected with  $10^7$  PFU of rVV Nluc/GFP. Lungs were harvested on

865 days 2 and 4 post-infection, enzymatically digested, and mechanically disrupted to

866 obtain single cell suspensions. After gating in live single GFP<sup>+</sup> cells a stepwise gating

867 strategy was used to distinguish subsets of virus-infected cells based on CD45<sup>+</sup>

868 expression and staining with specific antibodies to identify and enumerate macrophages

869 (CD64<sup>+</sup> CD11b<sup>+</sup>), neutrophils (CD64<sup>-</sup> CD11b<sup>+</sup> Ly6G<sup>+</sup>), monocyte-derived DC (CD11b<sup>+</sup>1-

870 A<sup>b+</sup>Ly6C<sup>+</sup>), monocytes/undifferentiated macrophages (CD11b<sup>+</sup>CD64<sup>+</sup>I-A<sup>b-/low</sup>Ly6C<sup>+/-</sup>),

871 and interstitial macrophages (CD11b<sup>+</sup>1-A<sup>b+</sup> CD64<sup>int/hi</sup>). Representative plots for each

872 immune subset are shown (n = 4 mice/group).

873

874

875

876

877

878

879

880

881

882

883

884 **REFERENCES**

885 1. Moss B. 2013. Poxvirus DNA replication. *Cold Spring Harb Perspect Biol* 5.

886 2. Shailubhai K. 2003. Bioterrorism: a new frontier for drug discovery and  
887 development. *IDrugs* 6:773-80.

888 3. Merchlinsky M, Albright A, Olson V, Schiltz H, Merkeley T, Hughes C, Petersen  
889 B, Challberg M. 2019. The development and approval of tecoviromat (TPOXX).  
890 *Antiviral Res* 168:168-174.

891 4. Delaune D, Iseni F. 2020. Drug Development against Smallpox: Present and  
892 Future. *Antimicrob Agents Chemother* 64.

893 5. Sklenovská N, Van Ranst M. 2018. Emergence of Monkeypox as the Most  
894 Important Orthopoxvirus Infection in Humans. *Front Public Health* 6:241.

- 895 6. Smith GL, Benfield CTO, Maluquer de Motes C, Mazzon M, Ember SWJ,  
896 Ferguson BJ, Sumner RP. 2013. Vaccinia virus immune evasion: mechanisms,  
897 virulence and immunogenicity. *J Gen Virol* 94:2367-2392.
- 898 7. Moss B. 2016. Membrane fusion during poxvirus entry. *Semin Cell Dev Biol*  
899 60:89-96.
- 900 8. Moss B. 2012. Poxvirus cell entry: how many proteins does it take? *Viruses*  
901 4:688-707.
- 902 9. Johnson MC, Damon IK, Karem KL. 2008. A rapid, high-throughput vaccinia virus  
903 neutralization assay for testing smallpox vaccine efficacy based on detection of  
904 green fluorescent protein. *J Virol Methods* 150:14-20.
- 905 10. Rozelle DK, Filone CM, Dower K, Connor JH. 2014. Vaccinia reporter viruses for  
906 quantifying viral function at all stages of gene expression. *J Vis Exp*  
907 doi:10.3791/51522.
- 908 11. Dower K, Rubins KH, Hensley LE, Connor JH. 2011. Development of Vaccinia  
909 reporter viruses for rapid, high content analysis of viral function at all stages of  
910 gene expression. *Antiviral Res* 91:72-80.
- 911 12. Bartee E, Mohamed MR, Lopez MC, Baker HV, McFadden G. 2009. The addition  
912 of tumor necrosis factor plus beta interferon induces a novel synergistic antiviral  
913 state against poxviruses in primary human fibroblasts. *J Virol* 83:498-511.
- 914 13. Ward BM, Moss B. 2001. Visualization of intracellular movement of vaccinia virus  
915 virions containing a green fluorescent protein-B5R membrane protein chimera. *J*  
916 *Virol* 75:4802-13.



- 917 14. Breen M, Nogales A, Baker SF, Perez DR, Martinez-Sobrido L. 2016.  
918 Replication-Competent Influenza A and B Viruses Expressing a Fluorescent  
919 Dynamic Timer Protein for In Vitro and In Vivo Studies. *PLoS One* 11:e0147723.
- 920 15. Breen M, Nogales A, Baker SF, Martínez-Sobrido L. 2016. Replication-  
921 Competent Influenza A Viruses Expressing Reporter Genes. *Viruses* 8.
- 922 16. Nogales A, Baker SF, Martínez-Sobrido L. 2015. Replication-competent influenza  
923 A viruses expressing a red fluorescent protein. *Virology* 476:206-16.
- 924 17. Nogales A, Rodriguez-Sanchez I, Monte K, Lenschow DJ, Perez DR, Martinez-  
925 Sobrido L. 2015. Replication-competent fluorescent-expressing influenza B virus.  
926 *Virus Research* 213:69-81.
- 927 18. Stacer AC, Nyati S, Moudgil P, Iyengar R, Luker KE, Rehemtulla A, Luker GD.  
928 2013. NanoLuc reporter for dual luciferase imaging in living animals. *Mol Imaging*  
929 12:1-13.
- 930 19. Tran V, Poole DS, Jeffery JJ, Sheahan TP, Creech D, Yevtodiyenko A, Peat AJ,  
931 Francis KP, You S, Mehle A. 2015. Multi-Modal Imaging with a Toolbox of  
932 Influenza A Reporter Viruses. *Viruses* 7:5319-27.
- 933 20. Czako R, Vogel L, Lamirande EW, Bock KW, Moore IN, Ellebedy AH, Ahmed R,  
934 Mehle A, Subbarao K. 2017. In Vivo Imaging of Influenza Virus Infection in  
935 Immunized Mice. *MBio* 8.
- 936 21. Heaton NS, Leyva-Grado VH, Tan GS, Eggink D, Hai R, Palese P. 2013. In vivo  
937 bioluminescent imaging of influenza a virus infection and characterization of  
938 novel cross-protective monoclonal antibodies. *J Virol* 87:8272-81.

- 939 22. Kelkar M, De A. 2012. Bioluminescence based in vivo screening technologies.  
940 Curr Opin Pharmacol 12:592-600.
- 941 23. Hall MP, Unch J, Binkowski BF, Valley MP, Butler BL, Wood MG, Otto P,  
942 Zimmerman K, Vidugiris G, Machleidt T, Robers MB, Benink HA, Eggers CT,  
943 Slater MR, Meisenheimer PL, Klaubert DH, Fan F, Encell LP, Wood KV. 2012.  
944 Engineered luciferase reporter from a deep sea shrimp utilizing a novel  
945 imidazopyrazinone substrate. ACS Chem Biol 7:1848-57.
- 946 24. Dominguez J, Lorenzo MM, Blasco R. 1998. Green fluorescent protein  
947 expressed by a recombinant vaccinia virus permits early detection of infected  
948 cells by flow cytometry. J Immunol Methods 220:115-21.
- 949 25. Sanchez-Puig JM, Sanchez L, Roy G, Blasco R. 2004. Susceptibility of different  
950 leukocyte cell types to Vaccinia virus infection. Virol J 1:10.
- 951 26. Lam AJ, St-Pierre F, Gong Y, Marshall JD, Cranfill PJ, Baird MA, McKeown MR,  
952 Wiedenmann J, Davidson MW, Schnitzer MJ, Tsien RY, Lin MZ. 2012. Improving  
953 FRET dynamic range with bright green and red fluorescent proteins. Nat  
954 Methods 9:1005-12.
- 955 27. Lorenzo MM, Sánchez-Puig JM, Blasco R. 2019. Genes A27L and F13L as  
956 Genetic Markers for the Isolation of Recombinant Vaccinia Virus. Sci Rep  
957 9:15684.
- 958 28. Bindels DS, Haarbosch L, van Weeren L, Postma M, Wiese KE, Mastop M,  
959 Aumonier S, Gotthard G, Royant A, Hink MA, Gadella TW. 2017. mScarlet: a  
960 bright monomeric red fluorescent protein for cellular imaging. Nat Methods 14:53-  
961 56.

- 962 29. Lorenzo MM, Galindo I, Blasco R. 2004. Construction and isolation of  
963 recombinant vaccinia virus using genetic markers. *Methods Mol Biol* 269:15-30.
- 964 30. Chakrabarti S, Sisler JR, Moss B. 1997. Compact, synthetic, vaccinia virus  
965 early/late promoter for protein expression. *Biotechniques* 23:1094-7.
- 966 31. Cotter CA, Earl PL, Wyatt LS, Moss B. 2015. Preparation of Cell Cultures and  
967 Vaccinia Virus Stocks. *Curr Protoc Microbiol* 39:14A.3.1-14A.3.18.
- 968 32. National Research Council (U.S.). Committee for the Update of the Guide for the  
969 Care and Use of Laboratory Animals., Institute for Laboratory Animal Research  
970 (U.S.), National Academies Press (U.S.). 2011. Guide for the care and use of  
971 laboratory animals, 8th ed. National Academies Press, Washington, D.C.
- 972 33. Rodriguez L, Nogales A, Martínez-Sobrido L. 2017. Influenza A Virus Studies in  
973 a Mouse Model of Infection. *J Vis Exp* doi:10.3791/55898.
- 974 34. Nogales A, Martinez-Sobrido L, Chiem K, Topham DJ, DeDiego ML. 2018.  
975 Functional Evolution of the 2009 Pandemic H1N1 Influenza Virus NS1 and PA in  
976 Humans. *Journal of Virology* 92.
- 977 35. Nogales A, Baker SF, Ortiz-Riano E, Dewhurst S, Topham DJ, Martinez-Sobrido  
978 L. 2014. Influenza A Virus Attenuation by Codon Deoptimization of the NS Gene  
979 for Vaccine Development. *Journal of Virology* 88:10525-40.
- 980 36. REED LJ, MUENCH H. 1938. A SIMPLE METHOD OF ESTIMATING FIFTY  
981 PER CENT ENDPOINTS<sup>12</sup>. *American Journal of Epidemiology* 27:493-497.
- 982 37. Chiem K, Rangel-Moreno J, Nogales A, Martinez-Sobrido L. 2019. A Luciferase-  
983 fluorescent Reporter Influenza Virus for Live Imaging and Quantification of Viral  
984 Infection. *J Vis Exp* doi:10.3791/59890.

- 985 38. Nogales A, Ávila-Pérez G, Rangel-Moreno J, Chiem K, DeDiego ML, Martínez-  
986 Sobrido L. 2019. A novel fluorescent and bioluminescent Bi-Reporter influenza A  
987 virus (BIRFLU) to evaluate viral infections. *J Virol* doi:10.1128/JVI.00032-19.
- 988 39. Dietert K, Gutbier B, Wienhold SM, Reppe K, Jiang X, Yao L, Chaput C, Naujoks  
989 J, Brack M, Kupke A, Peteranderl C, Becker S, von Lachner C, Baal N, Slevogt  
990 H, Hocke AC, Witzernath M, Opitz B, Herold S, Hackstein H, Sander LE, Suttorp  
991 N, Gruber AD. 2017. Spectrum of pathogen- and model-specific histopathologies  
992 in mouse models of acute pneumonia. *PLoS One* 12:e0188251.
- 993 40. Klopffleisch R. 2013. Multiparametric and semiquantitative scoring systems for  
994 the evaluation of mouse model histopathology--a systematic review. *BMC Vet*  
995 *Res* 9:123.
- 996 41. Zhao H, Doyle TC, Coquoz O, Kalish F, Rice BW, Contag CH. 2005. Emission  
997 spectra of bioluminescent reporters and interaction with mammalian tissue  
998 determine the sensitivity of detection in vivo. *Journal of Biomedical Optics*  
999 10:41210.
- 1000 42. Rodriguez JF, Rodriguez D, Rodriguez JR, McGowan EB, Esteban M. 1988.  
1001 Expression of the firefly luciferase gene in vaccinia virus: a highly sensitive gene  
1002 marker to follow virus dissemination in tissues of infected animals. *Proc Natl*  
1003 *Acad Sci U S A* 85:1667-71.
- 1004 43. Sánchez-Puig JM, Sánchez L, Roy G, Blasco R. 2004. Susceptibility of different  
1005 leukocyte cell types to Vaccinia virus infection. *Virol J* 1:10.
- 1006 44. Paley MA, Prescher JA. 2014. Bioluminescence: a versatile technique for  
1007 imaging cellular and molecular features. *Medchemcomm* 5:255-267.

- 1008 45. Tran V, Moser LA, Poole DS, Mehle A. 2013. Highly sensitive real-time in vivo  
1009 imaging of an influenza reporter virus reveals dynamics of replication and spread.  
1010 J Virol 87:13321-9.
- 1011 46. De Baets S, Verhelst J, Van den Hoecke S, Smet A, Schotsaert M, Job ER,  
1012 Roose K, Schepens B, Fiers W, Saelens X. 2015. A GFP expressing influenza A  
1013 virus to report in vivo tropism and protection by a matrix protein 2 ectodomain-  
1014 specific monoclonal antibody. PLoS One 10:e0121491.
- 1015 47. Cheng BY, Ortiz-Riano E, de la Torre JC, Martinez-Sobrido L. 2015. Arenavirus  
1016 Genome Rearrangement for the Development of Live Attenuated Vaccines. J  
1017 Virol 89:7373-84.
- 1018 48. Park JG, Ávila-Pérez G, Nogales A, Blanco-Lobo P, de la Torre JC, Martínez-  
1019 Sobrido L. 2020. Identification and characterization of novel compounds with  
1020 broad spectrum antiviral activity against influenza A and B viruses. J Virol  
1021 doi:10.1128/JVI.02149-19.  
1022

A)

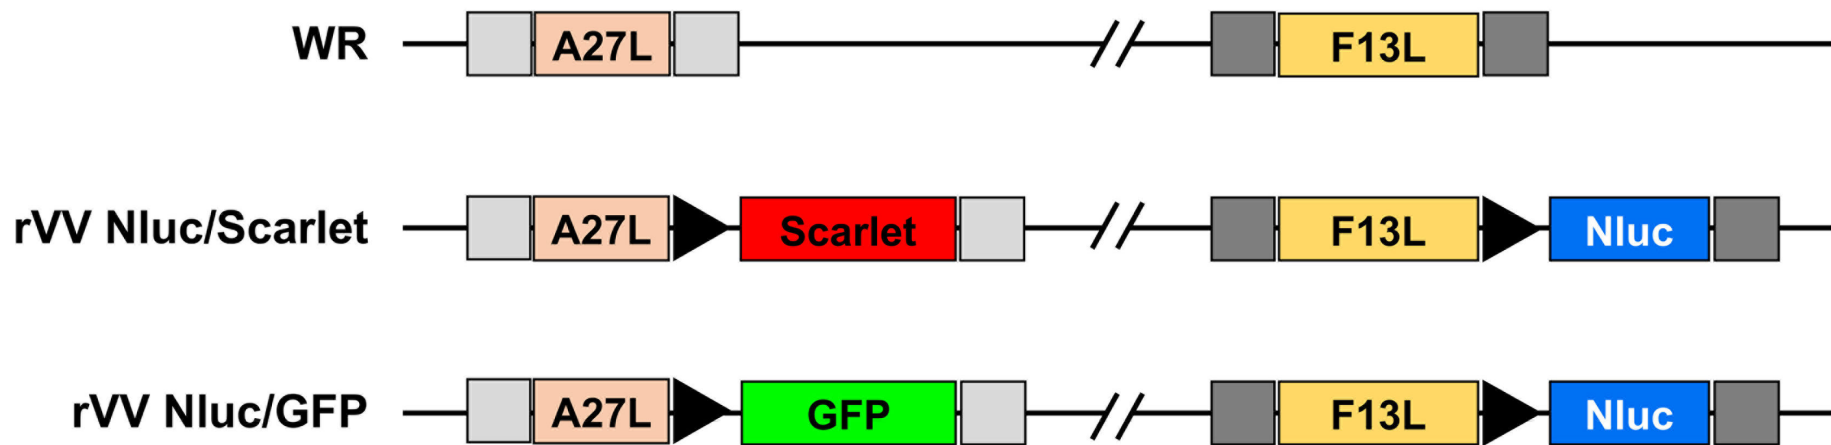

B)

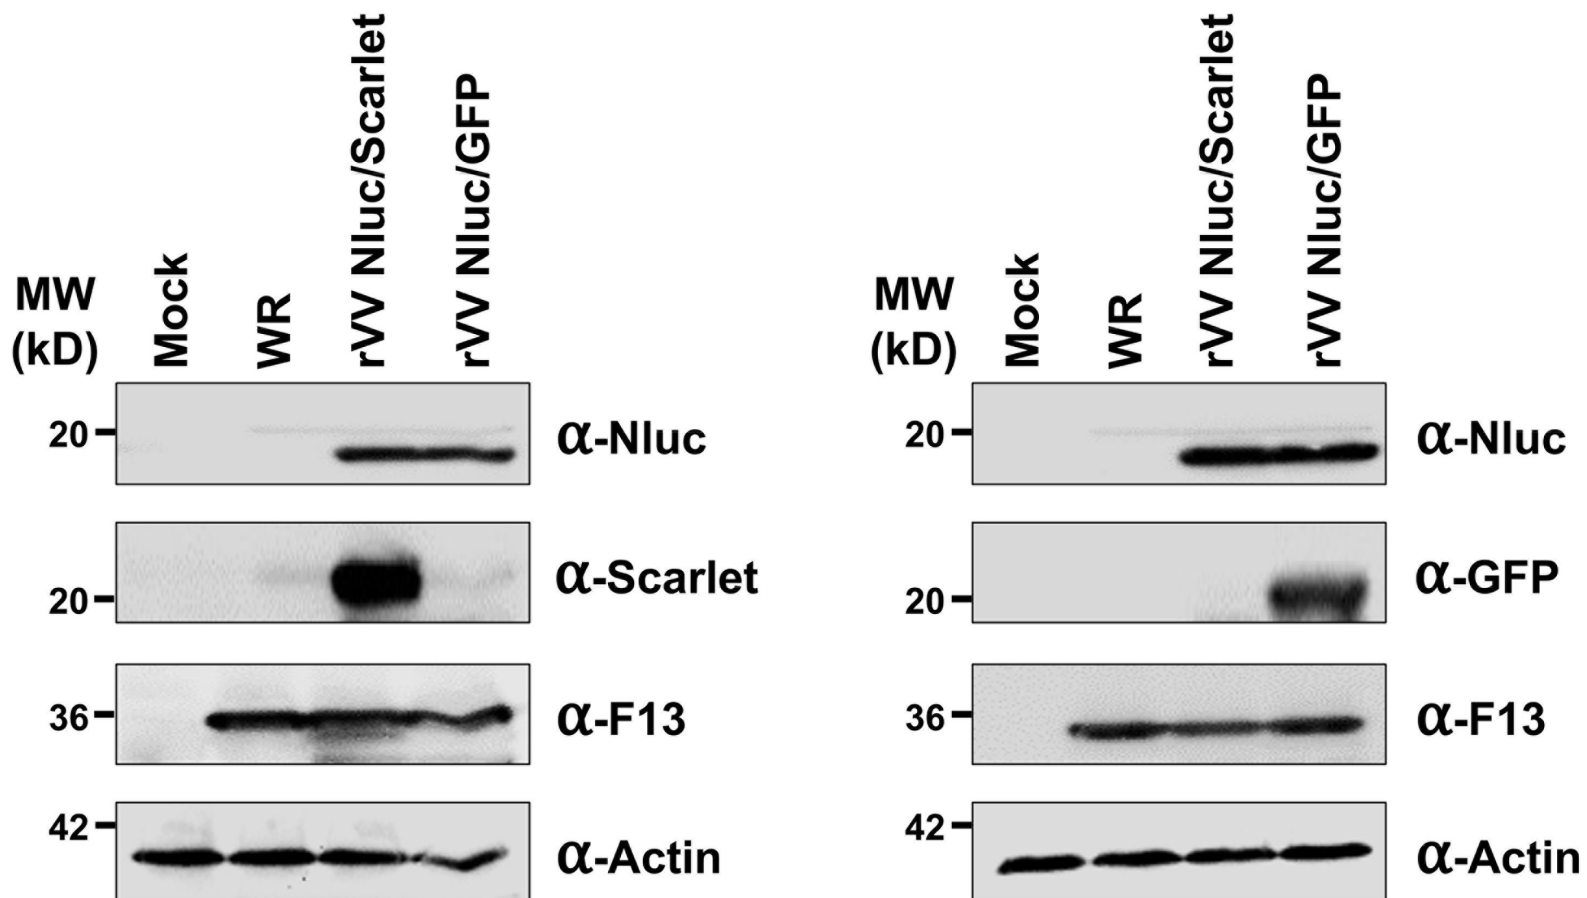

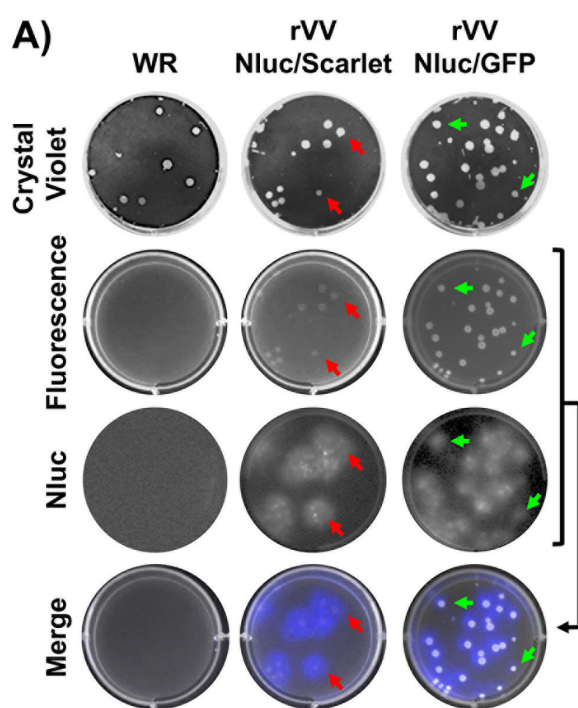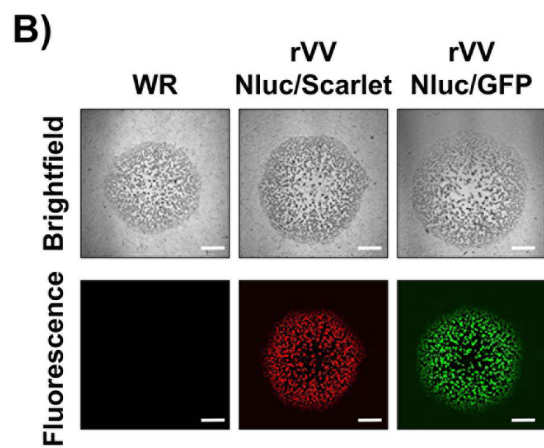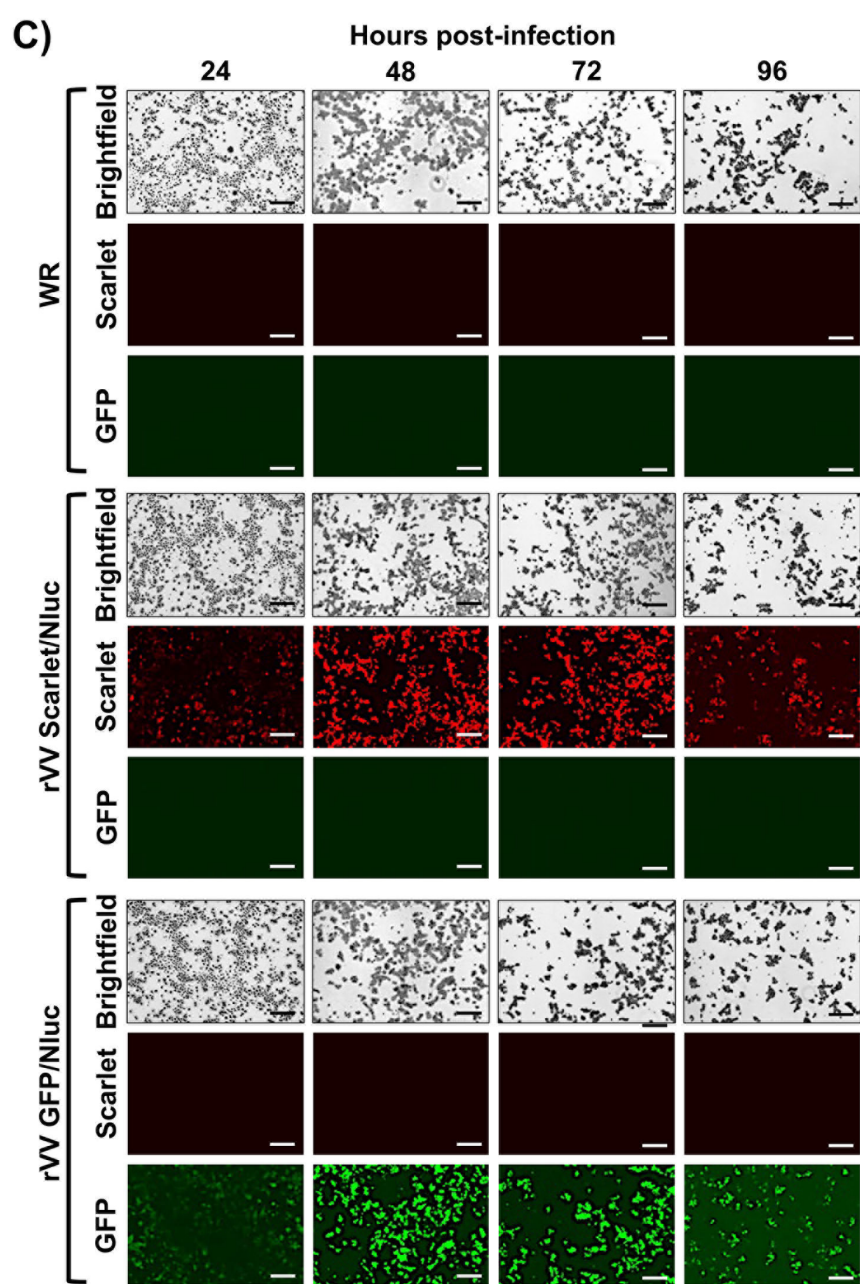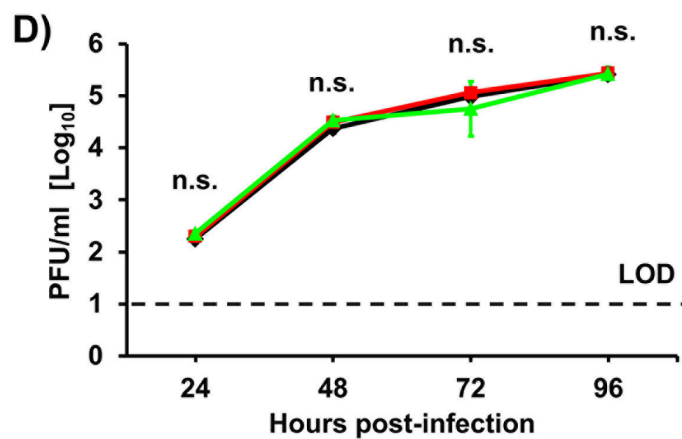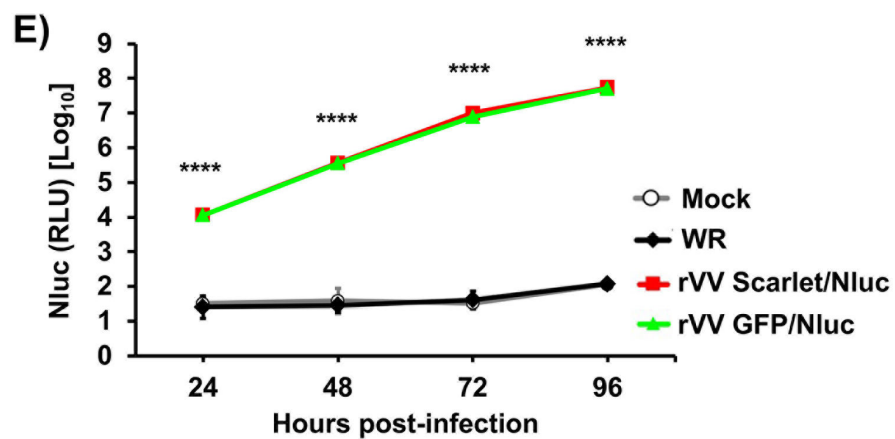

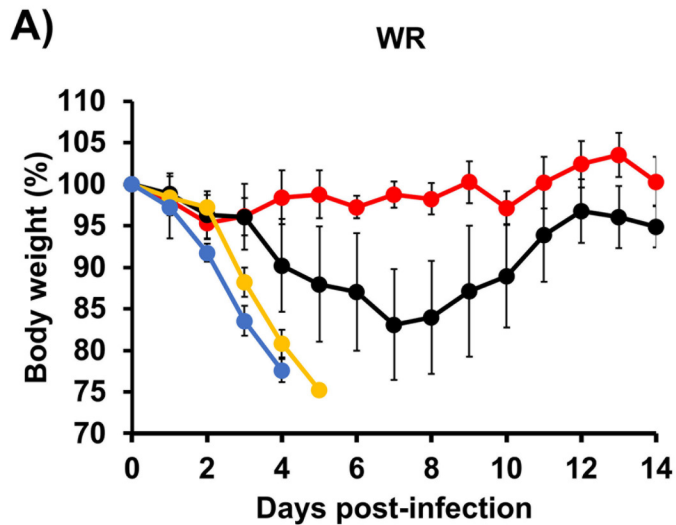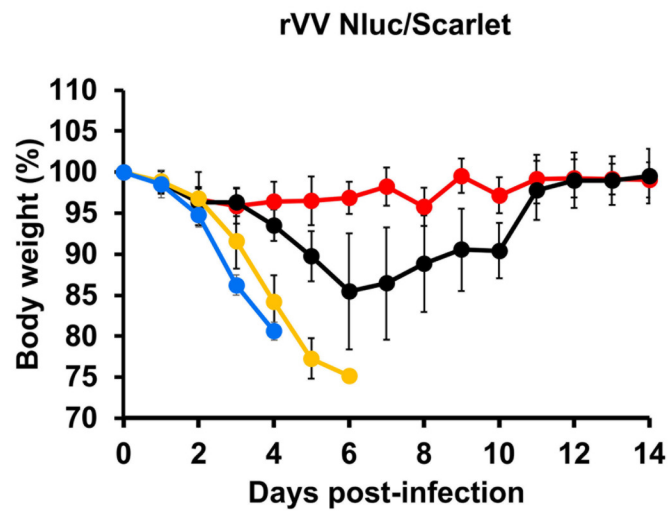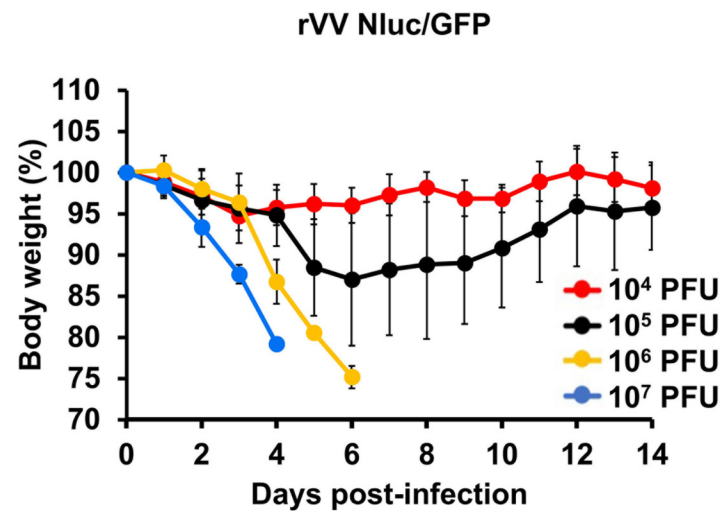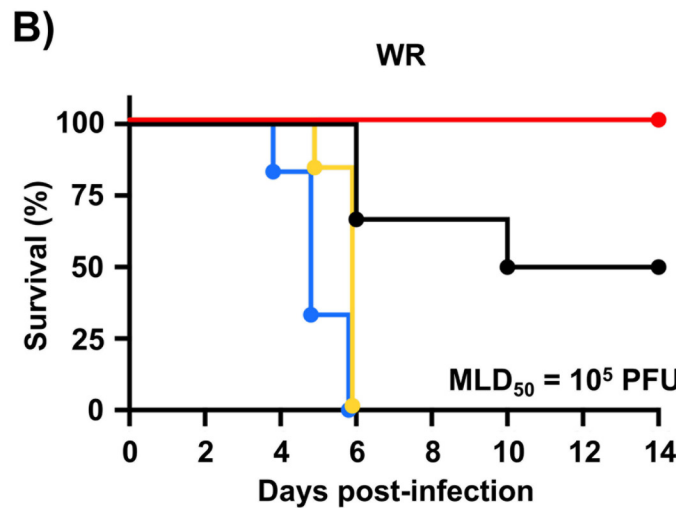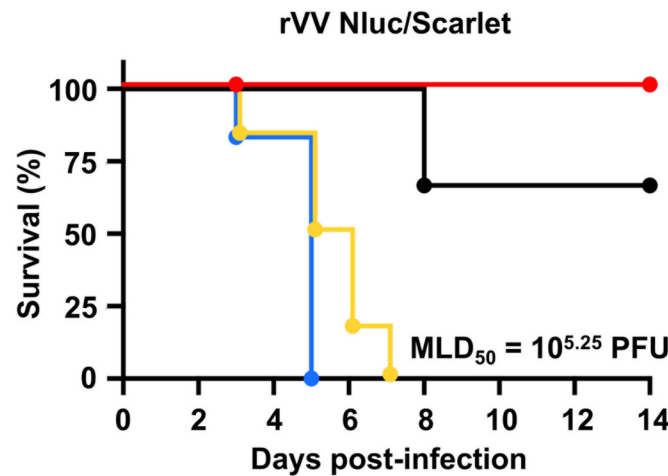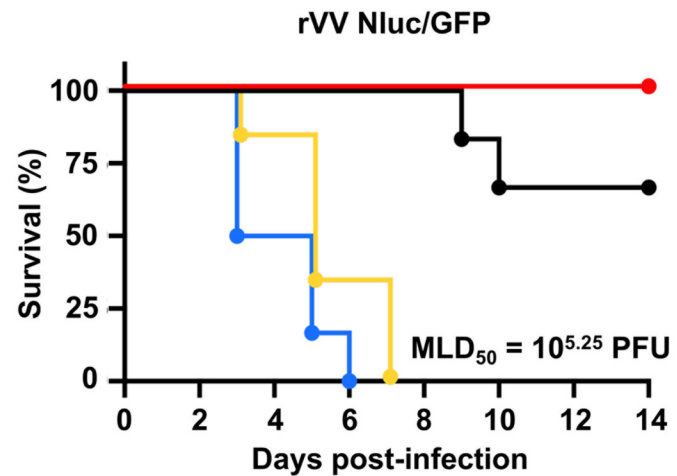



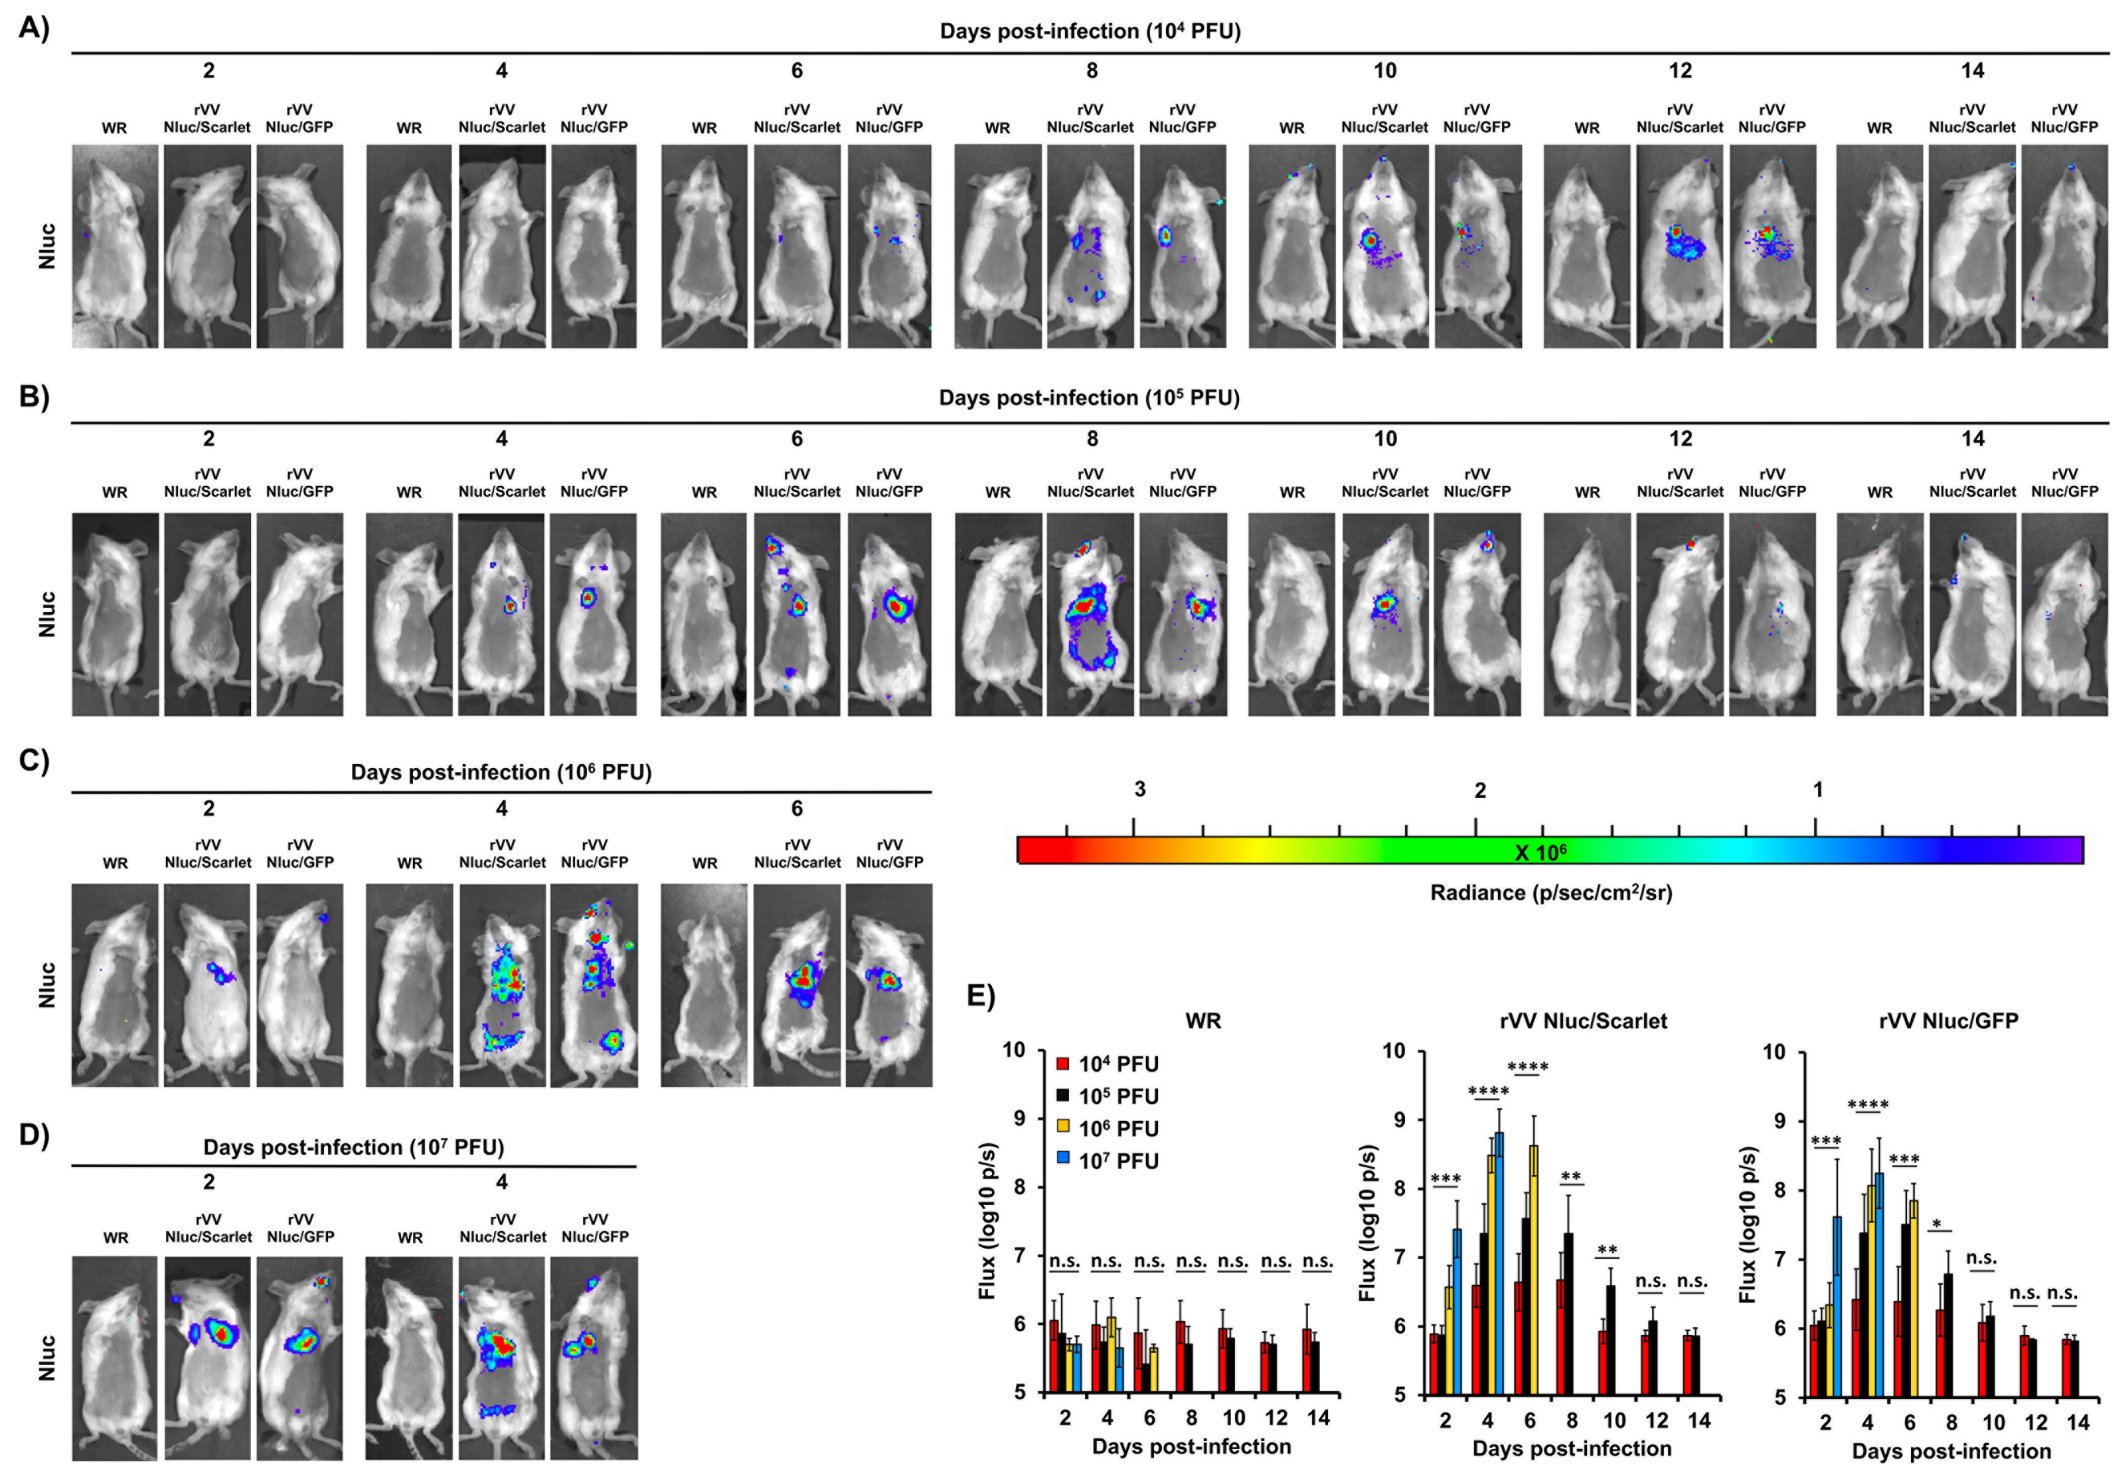

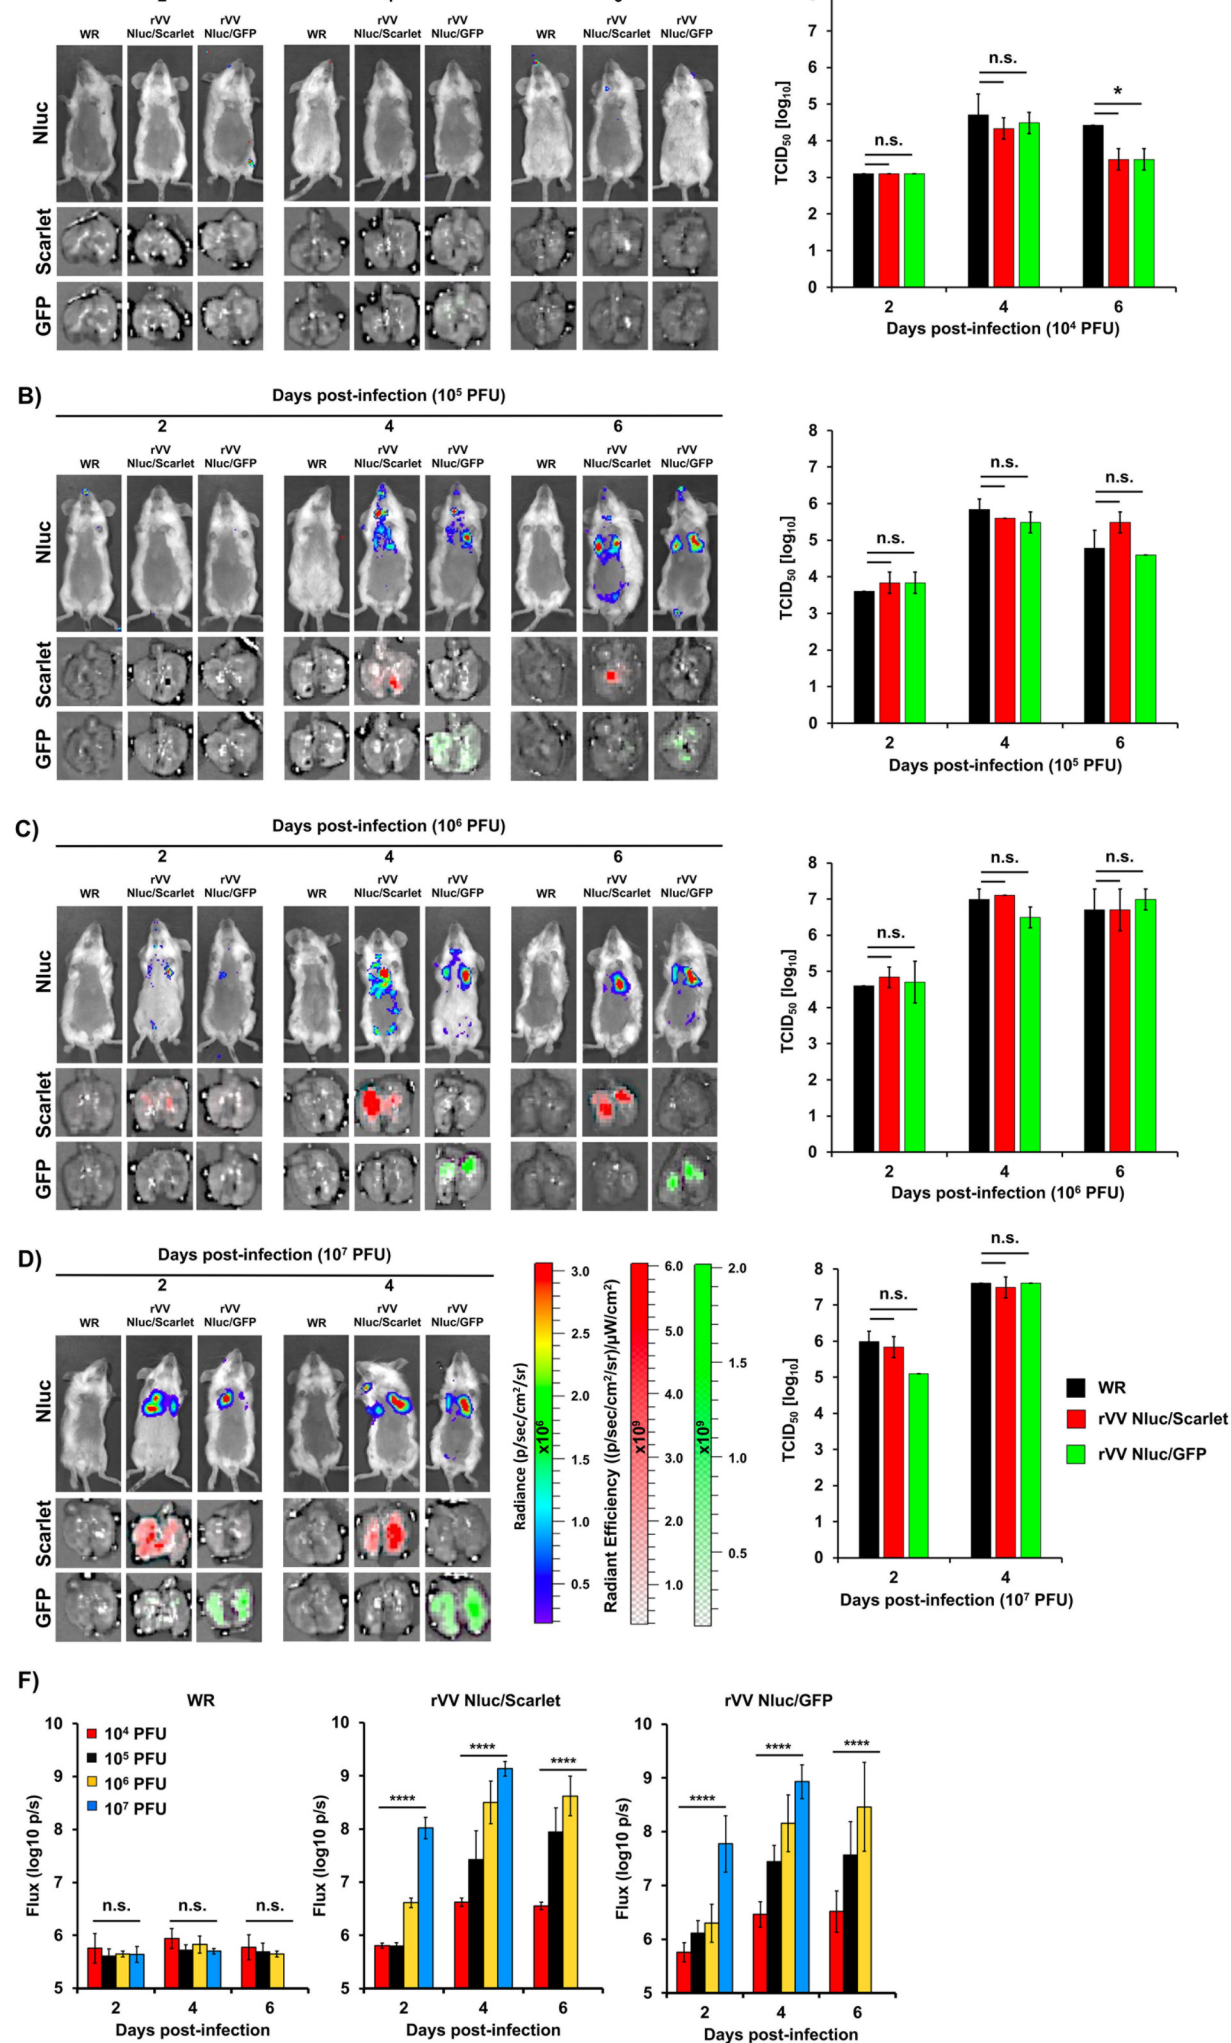

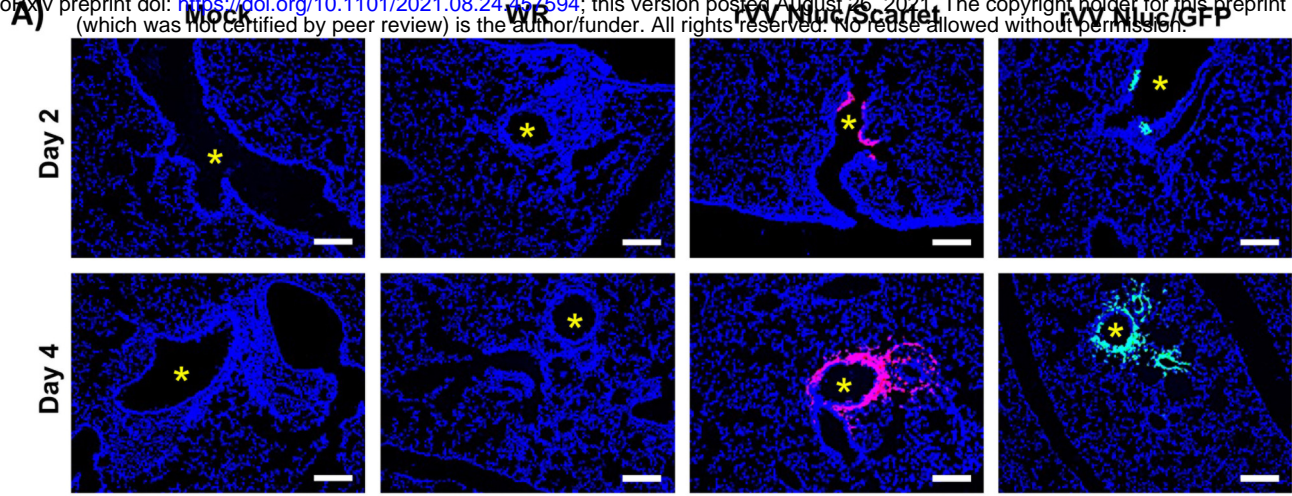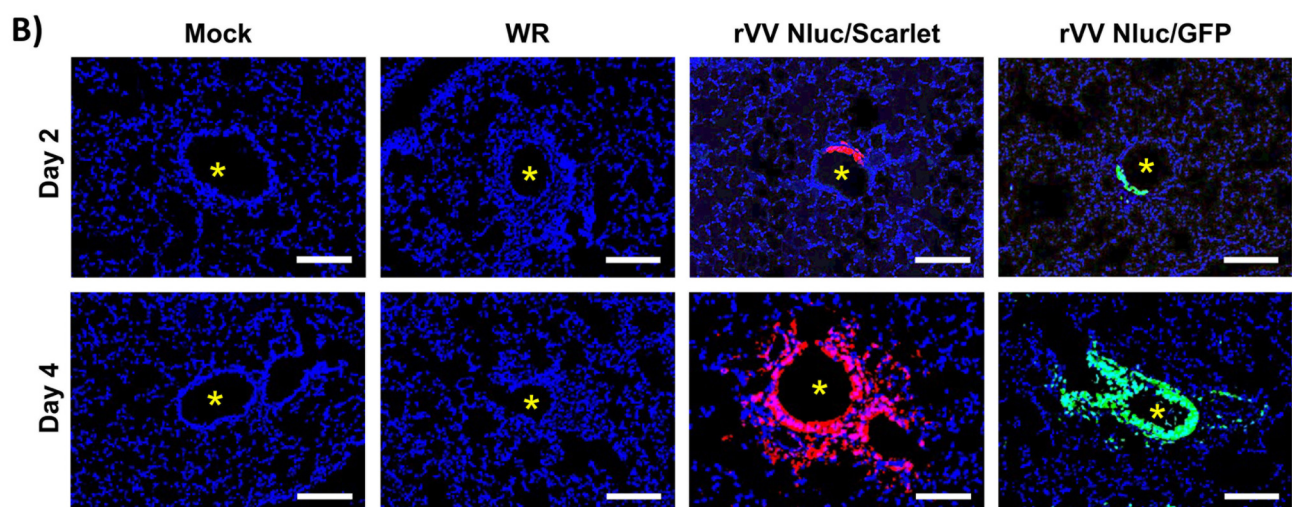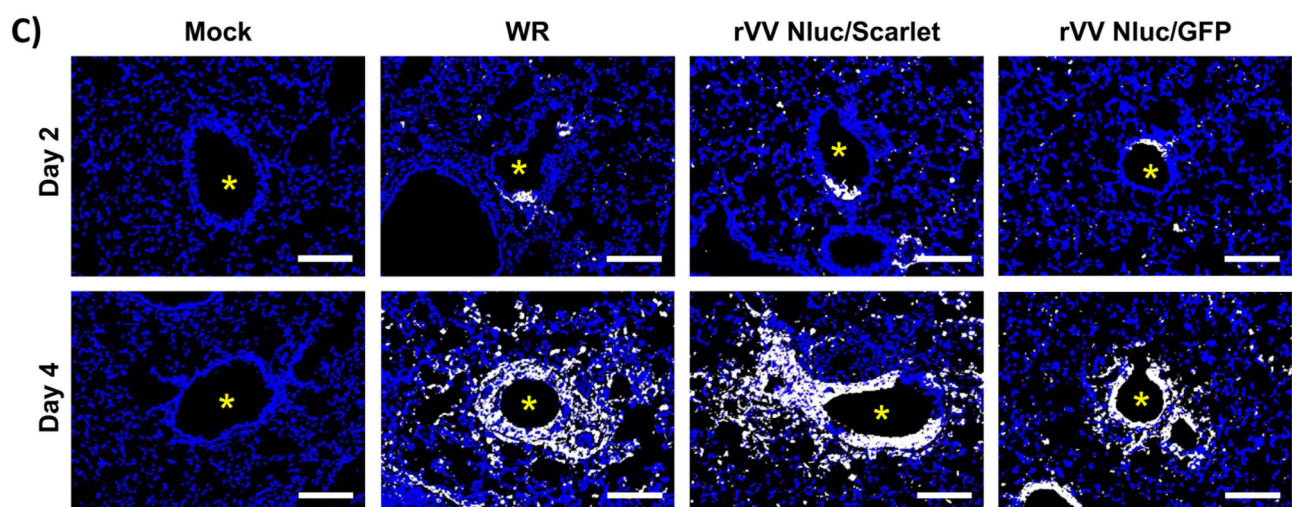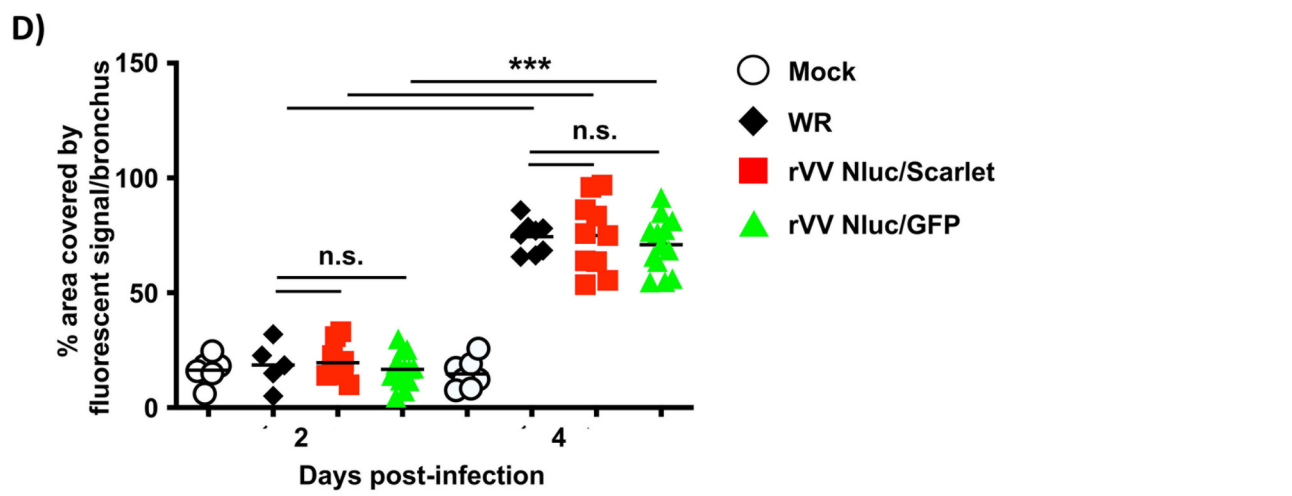

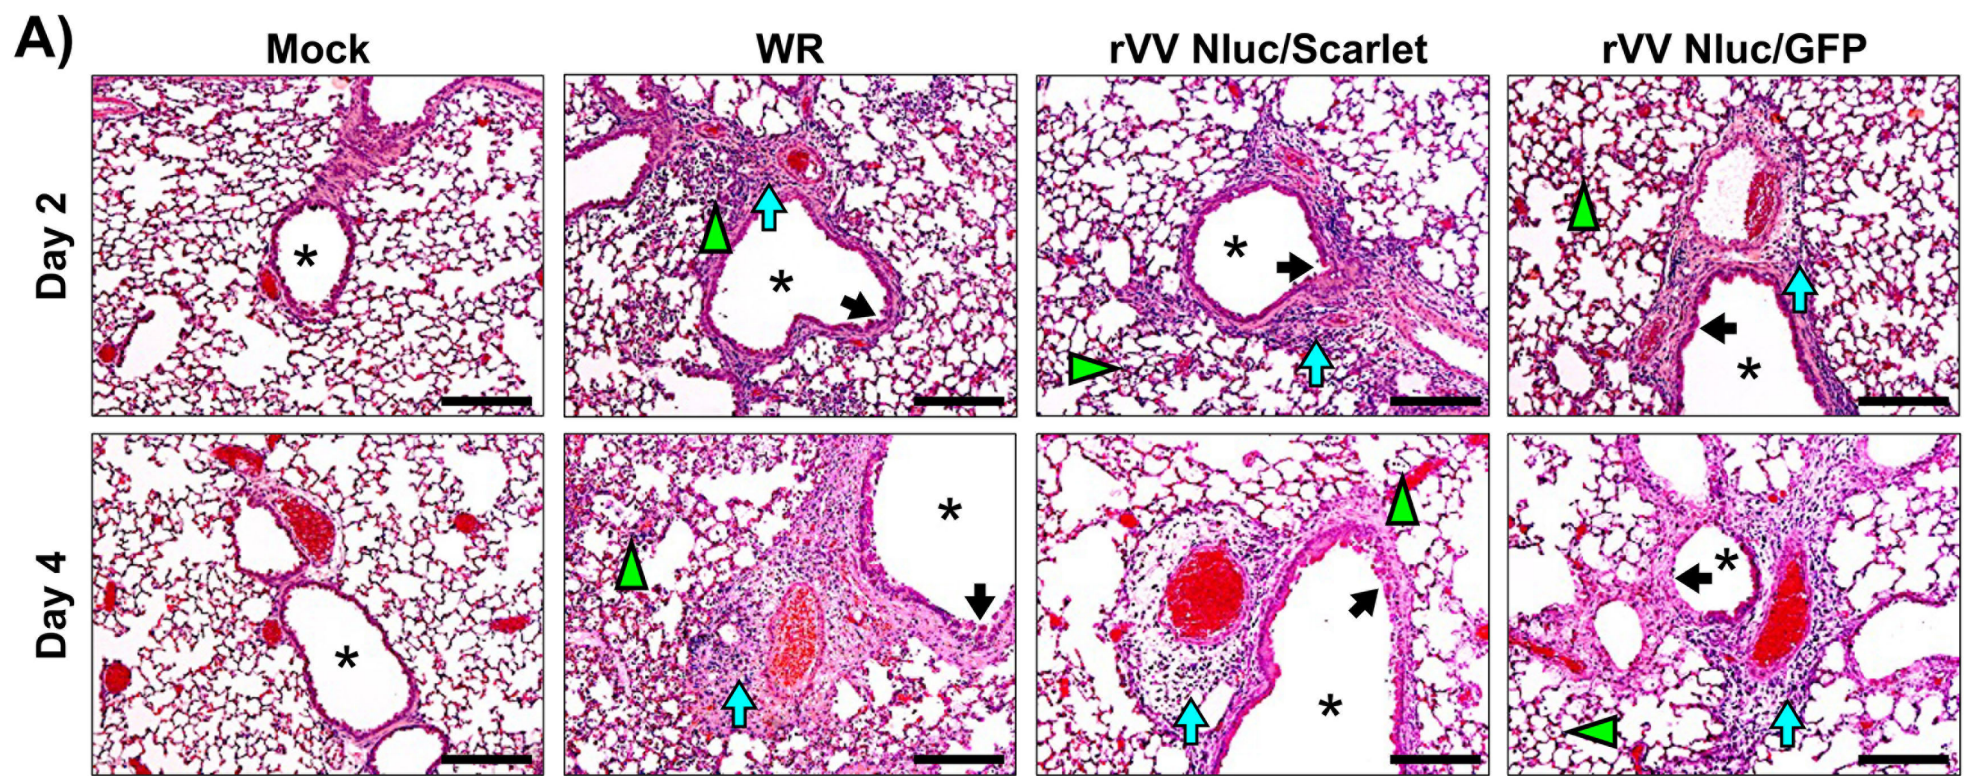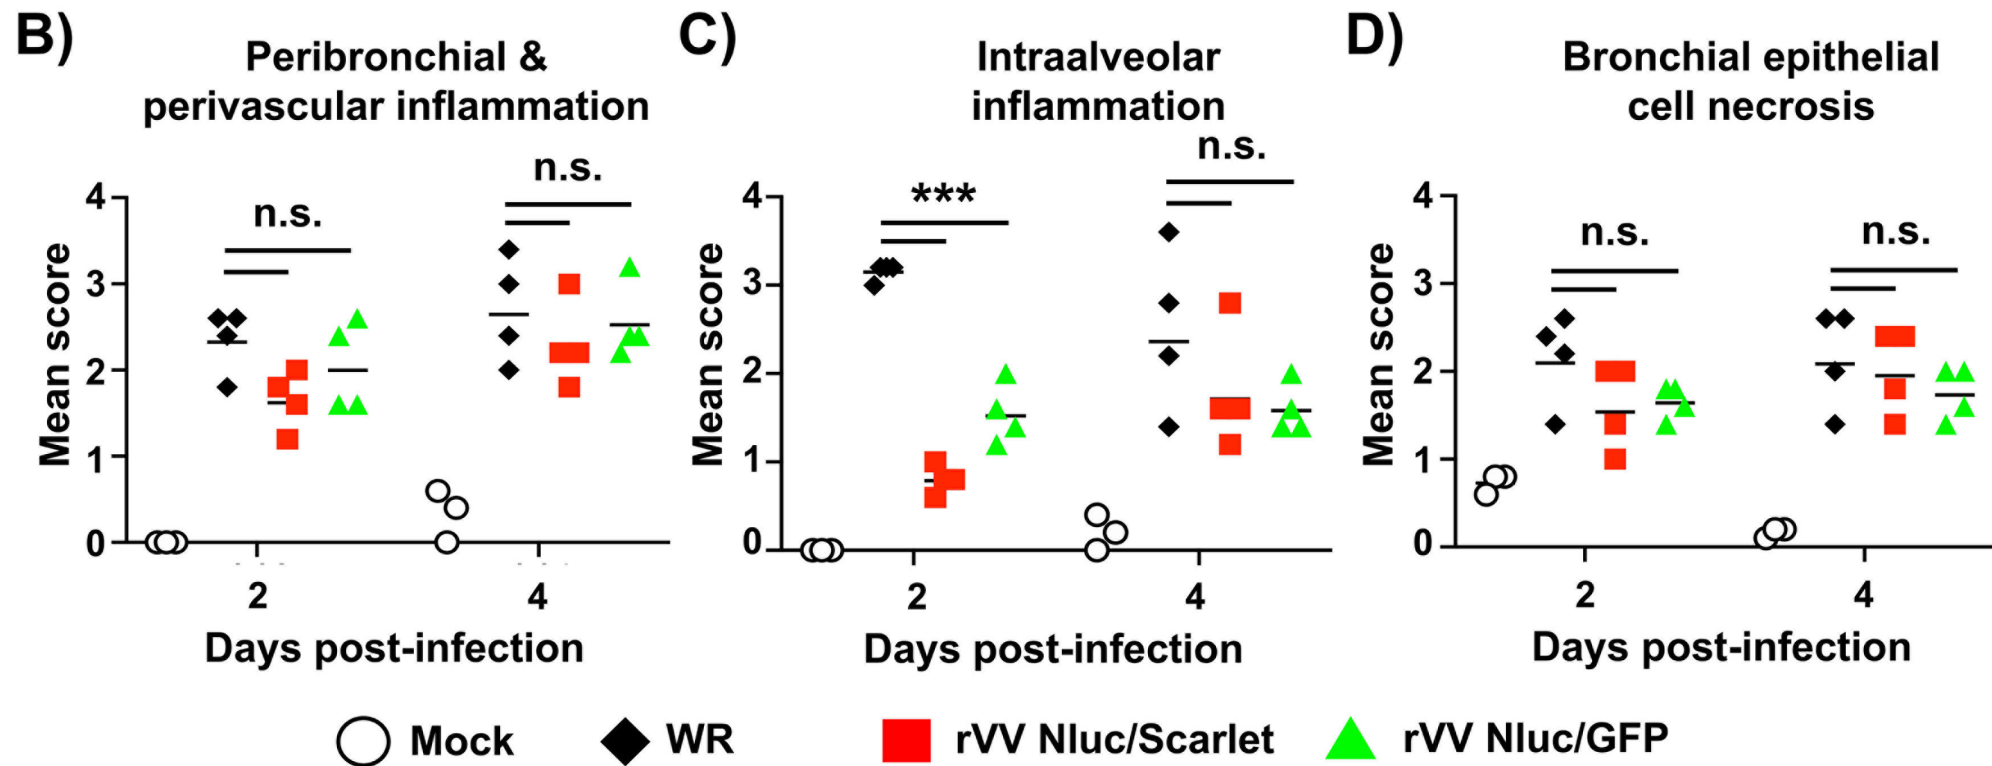

A)

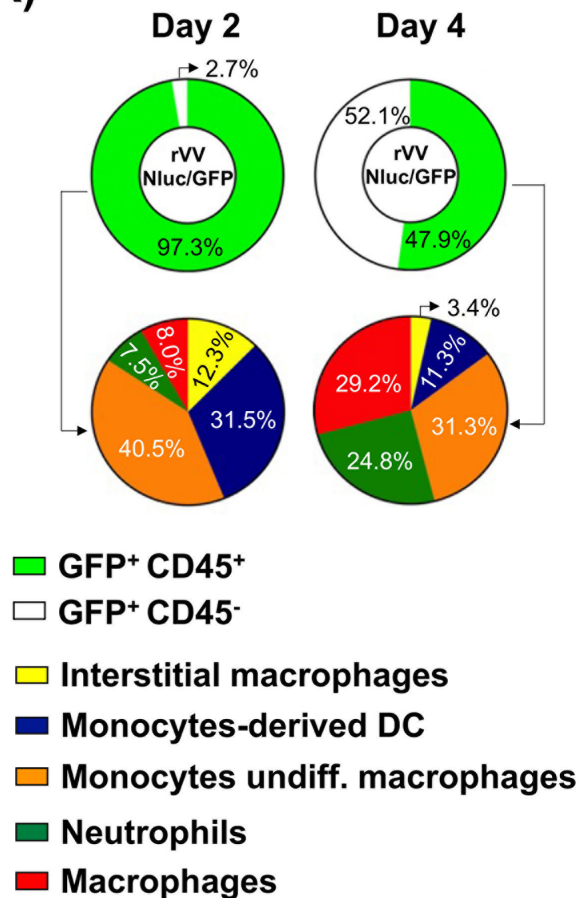

B)

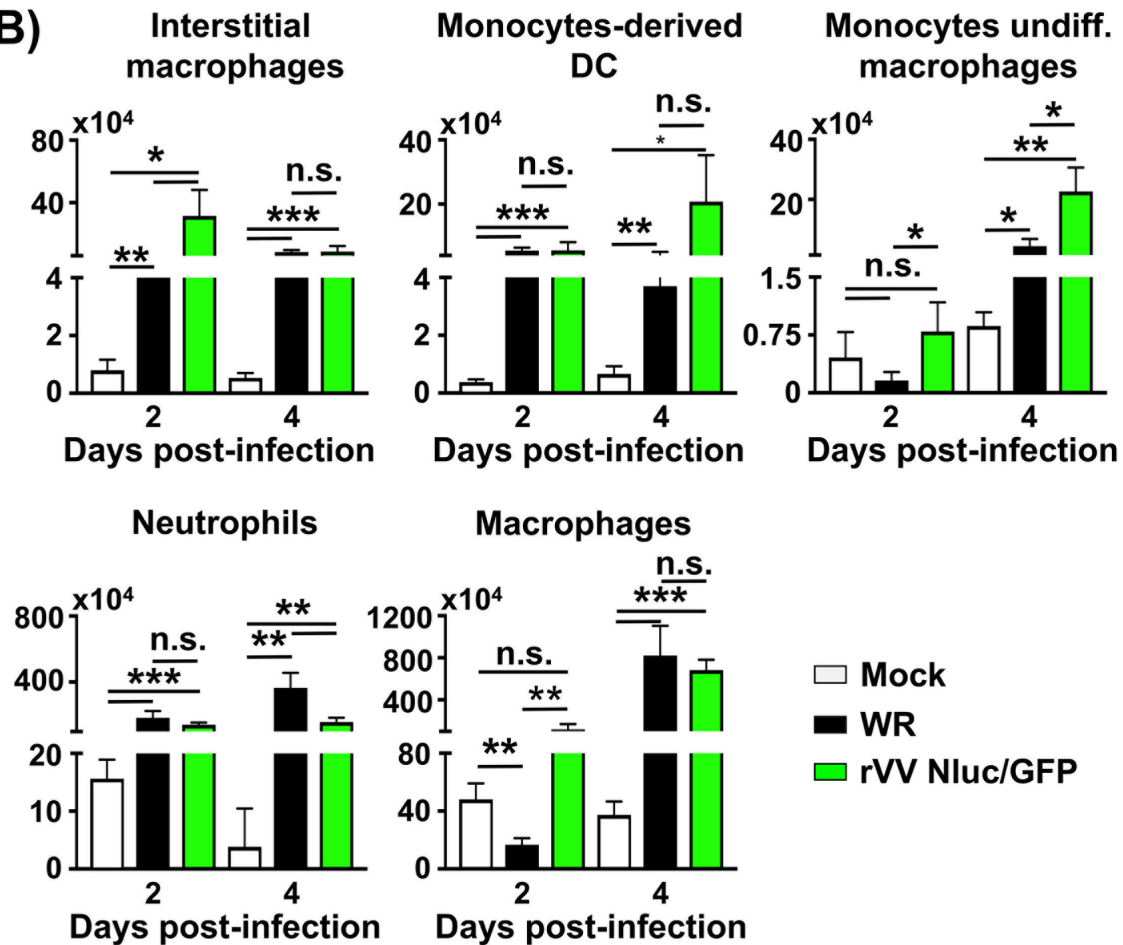

C)

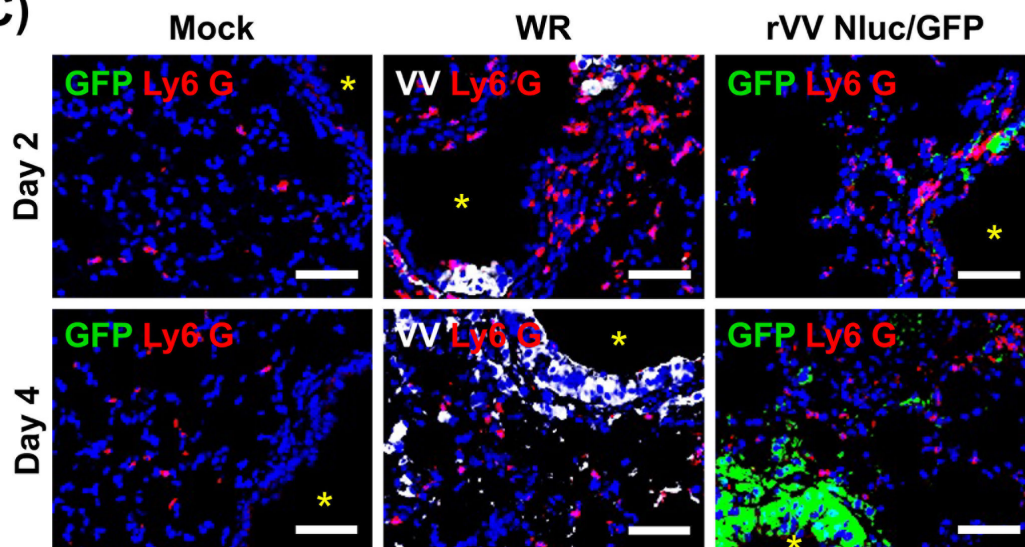

D)

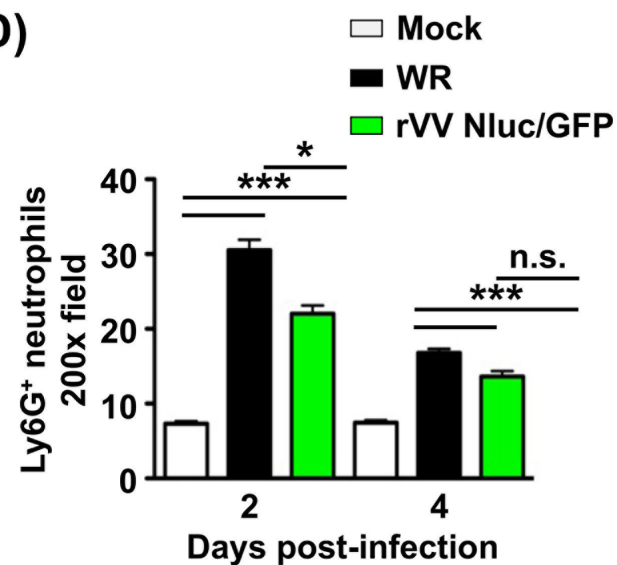

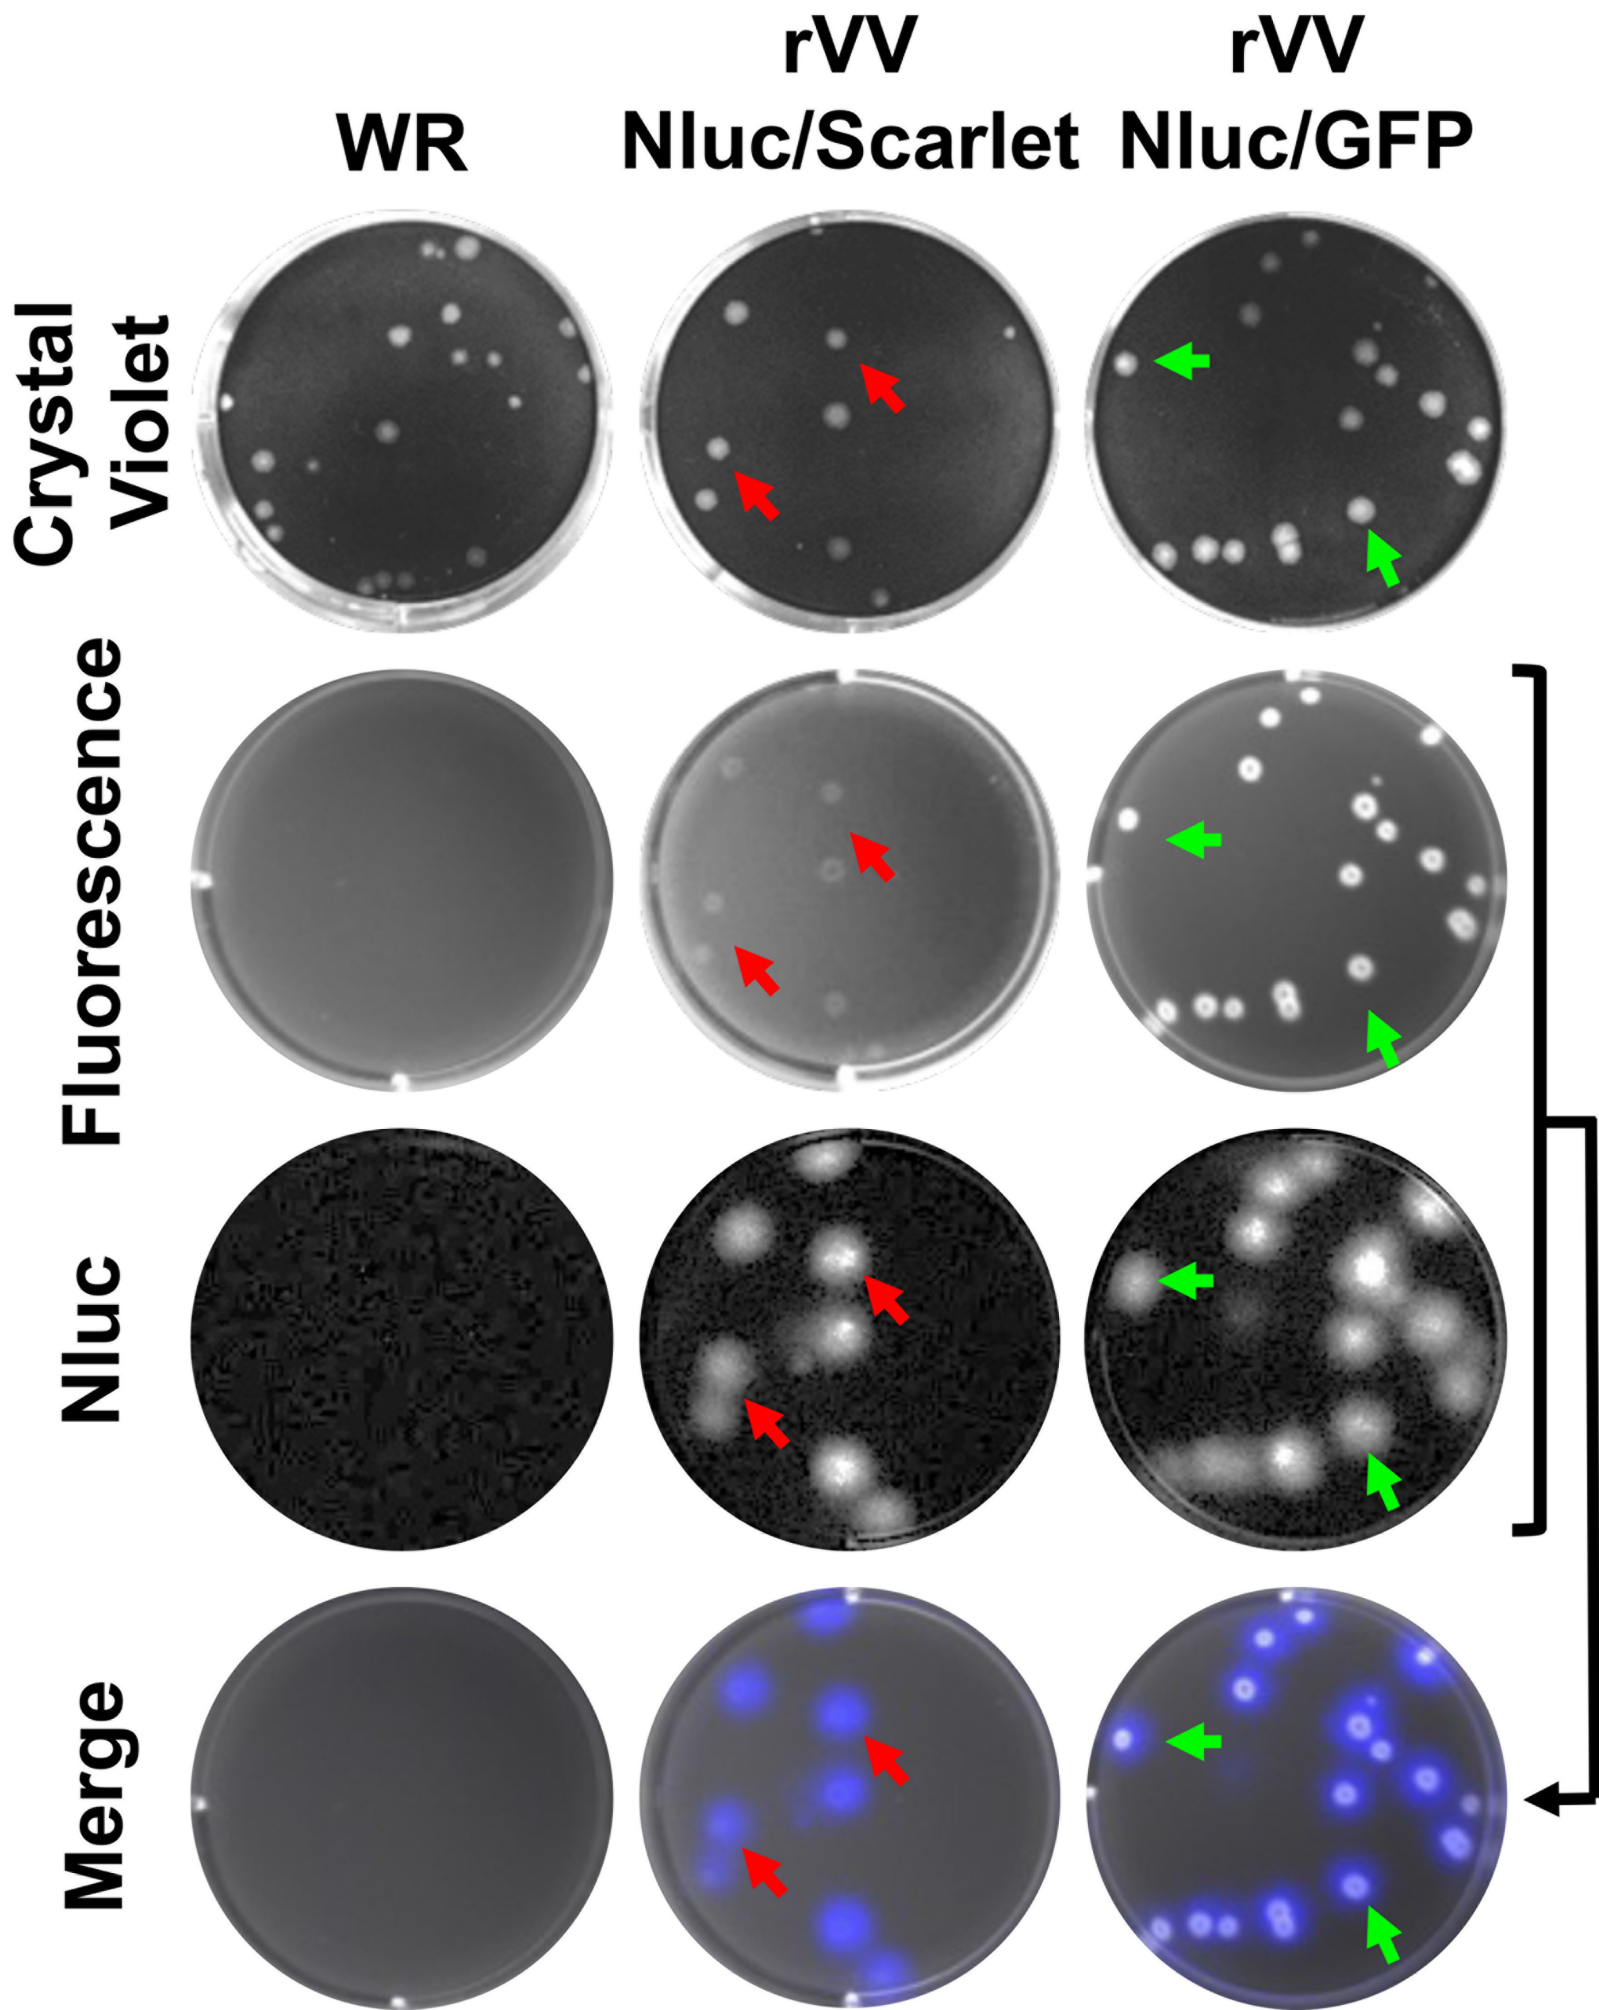

Source: https://www.biorxiv.org/content/biorxiv/early/2021/08/26/2021.08.24.457594.full.pdf
